# Supplementary material for: New N-Adducts of Thiadiazole and Thiazoline with Levoglucosenone and Evaluation of Their Significant Cytotoxic (Anti-Cancer) Activity
Source: MDPI journal article supplement (doi:10.3390/cancers16010216), 2024-01-02
Supplement: s1 [file s1]

## Supporting Information for

### **New *N*-adducts of thiadiazole and thiazoline with levoglucosenone and their evaluation of significant cytotoxic (anticancer) activity**

Tomasz Poplawski<sup>1</sup>, Grzegorz Galita<sup>2</sup>, Joanna Sarnik<sup>3</sup>, Anna Macieja<sup>1</sup>, Roman Bielski<sup>4</sup>, Donald E. Mencer<sup>5</sup> Zbigniew J. Witczak<sup>4\*</sup>

<sup>1</sup> Department of Pharmaceutical Microbiology and Biochemistry, Medical University, 92-215 Lodz, Poland

<sup>2</sup> Department of Clinical Chemistry and Biochemistry, Medical University, 92-215 Lodz, Poland

<sup>3</sup> Department of Rheumatology, Medical University, 90-050 Lodz, Poland.

<sup>4</sup> Department of Pharmaceutical Sciences, Nesbitt School of Pharmacy, Wilkes University, 84 W. South Street, Wilkes-Barre, PA 18766, USA

<sup>5</sup> Department of Chemistry and Biochemistry, Wilkes University, 84 W. South Street, Wilkes-Barre, PA 18766, USA

Email: zbigniew.witczak@wilkes.edu.

#### Contents

1. Synthetic procedures and data characterization
  2. Molecular properties of *FCP23* and *FCP26*
  3. X-Ray single crystal analysis and ORTEP for *FCP26*
  4. <sup>1</sup>H, <sup>13</sup>C NMR spectra *FCP23* and *FCP26*
  5. MS spectra *FCP23*
  6. The cytotoxicity of *FCP23* and *FCP26*
-

## 1. General information

All reagents and solvents were used as purchased without further purification. Unless otherwise stated, all reactions were carried out under inert atmosphere in oven-dried glassware with dried solvents. All solvents were dried and degassed by standard methods before use. Optical rotation was measured using a JASCO P-2000 Digital Polarimeter.

<sup>1</sup>H NMR and <sup>13</sup>C NMR spectra were recorded on 400MHz Bruker Avance. 2D experiments (COSY and HSQC) were performed to enhance assignments. Chemical shifts (δ-scale) are reported in ppm with TMS (0 ppm) as internal standard for <sup>1</sup>H NMR and the residual solvent signals (CDCl<sub>3</sub>: 7.26, for <sup>1</sup>H NMR and (CDCl<sub>3</sub>: 77.0 ppm) for <sup>13</sup>C NMR.

Thin layer chromatography was performed on silica gel coated TLC plates and visualized under UV light (at 254nm); detection was executed by exposing to iodine (I<sub>2</sub>) vapor. Mass spectra were obtained using APCI-Quadrupole technique. The melting points (mp) were obtained on an ElectroThermal FARGO MP-2D capillary melting point apparatus and were uncorrected. Chemical names were generated by ChemDraw Professional V.15.1.0.144 software.

## 2. Synthetic procedures and characterization data.

### General procedure for the synthesis of FCP23 and FCP 26

To a solution of levoglucosenone (**1**) 1.28g (0.01mole) in 35 mL of chloroform a 0.01 mole of thiols **2-3** was added and magnetically stirred for 5min. After that time, 1 mL of triethylamine was added drop-wise and the solution was refluxed for 24-48hr. Upon overnight cooling at 5°C the crystalline residue was filtered off and recrystallized from ethanol. The crystalline products were filtered off and dried on fresh air.

### (1*S*,2*S*,5*R*)-2-(3-amino-5-thioxo-1,2,4-thiadiazol-4(5*H*)-yl)-6,8-dioxabicyclo[3.2.1]octan-4-one (**23**)

Yield (1.9 g, 73%), White solid crystals; m.p.: 137–139 °C; *R* = 0.74 (1:4, hexane–EtOAc); [ $\alpha$ ]<sup>30</sup> – 124.3 (*c* 0.81, CHCl<sub>3</sub>); <sup>1</sup>H-NMR: δ (400 MHz; CDCl<sub>3</sub>), 5.37 (d, 1H, H-1), 5.76 (d, *J*<sub>3a-4</sub> = 9.6 Hz, 1H, H-4), 2.54 (d, 1H, H-3e), 4.92 (d, *J*<sub>5-6*exo*</sub> = 5.5 Hz, 1H, H-5), 4.23 (d, *J*<sub>gem</sub> = 8.2 Hz, 1H, H-6*endo*), 4.04 (dd, *J*<sub>gem</sub> = 8.2 Hz, *J*<sub>5-6*exo*</sub> = 5.5 Hz, 1H, H-6*exo*), 3.12 (dd, *J*<sub>gem</sub> = 9.6 Hz, 1H, H-3a), 2.83 (d, *J*<sub>gem</sub> = 18.6 Hz, 1H, H-3b), 9.15 (s, 1H, -NH<sub>2</sub>); <sup>13</sup>C-NMR δ (100 MHz; CDCl<sub>3</sub>) 31.03 (C-3), 48.04 (C-6), 56.51 (C-4), 66.41, 73.81 (C-5), 92.58, 102.86 (C-1), 158.95, 177.52 (C-2, C=O). HRMS *m/z* [M + H]: Calcd for C<sub>8</sub>H<sub>9</sub>N<sub>3</sub>O<sub>3</sub>S<sub>2</sub>: 259.30. Found: 260.00. For copies of the <sup>1</sup>H-NMR and <sup>13</sup>C-NMR see Supplementary Materials.

### (1*S*,2*S*,5*R*)-2-(2-thioxothiazolidin-3-yl)-6,8-dioxabicyclo[3.2.1]octan-4-one (**26**)

Yield (1.82 g, 74%), White solid crystals; m.p.: 144–146 °C; *R* = 0.57 (1:1, hexane–EtOAc); [ $\alpha$ ]<sup>30</sup> – 134.2 (*c* 0.84, CHCl<sub>3</sub>); <sup>1</sup>H-NMR: δ (400 MHz; CDCl<sub>3</sub>), 5.31 (d, 1H, H-1), 5.72 (d, *J*<sub>3a-4</sub> = 9.4 Hz, 1H, H-4), 2.58 (d, 1H, H-3e), 4.92 (d, *J*<sub>5-6*exo*</sub> = 5.3 Hz, 1H, H-5), 4.23 (d, *J*<sub>gem</sub> = 8.4 Hz, 1H, H-6*endo*), 4.04 (dd, *J*<sub>gem</sub> = 8.4 Hz, *J*<sub>5-6*exo*</sub> = 5.5 Hz, 1H, H-6*exo*) 3.16 (dd, *J*<sub>gem</sub> = 9.4 Hz, 1H, H-3a), 3.06 (d, *J*<sub>gem</sub> = 16.9 Hz, 2H, C-4 thiazoline) 3.21 (d, *J*<sub>gem</sub> = 17.1 Hz, 2H, C-5, thiazoline), 2.81 (d, *J*<sub>gem</sub> = 18.4 Hz, 1H, H-3b); <sup>13</sup>C-NMR δ (100 MHz; CDCl<sub>3</sub>) 31.1 (C-3), 36.7 (C-3, CH<sub>2</sub>-thiazoline), 39.4 (C-4, CH<sub>2</sub>-thiazoline), 68.4 (C-6), 70.6 (C-4), 78.2 (C-5), 104.4 (C-1), 128.7 (C-2, thiazoline), 207.2 (C-2, C=O). HRMS *m/z*, [M + H]: Calcd for C<sub>9</sub>H<sub>11</sub>N<sub>3</sub>O<sub>3</sub>S<sub>2</sub>: 245.02, Found: 246.0252. For copies of the <sup>1</sup>H-NMR and <sup>13</sup>C-NMR see Supplementary Materials.

## Crystal Structure Report for 26

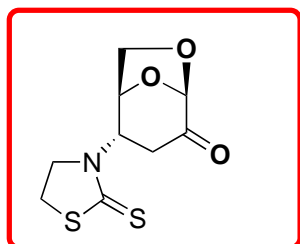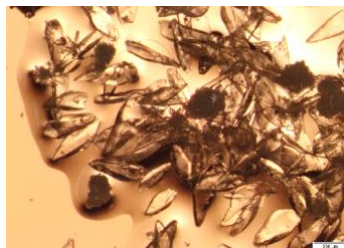

### (1*S*,2*S*,5*R*)-2-(2-thioxothiazolidin-3-yl)-6,8-dioxabicyclo[3.2.1]octan-4-one

A specimen of  $C_9H_{11}NO_3S_2$  was used for the X-ray crystallographic analysis. The X-ray intensity data were measured ( $\lambda = 0.71073 \text{ \AA}$ ).

The total exposure time was 16.27 hours. The frames were integrated with the Bruker SAINT software package using a narrow-frame algorithm. The integration of the data using an orthorhombic unit cell yielded a total of 17954 reflections to a maximum  $\theta$  angle of  $33.17^\circ$  ( $0.65 \text{ \AA}$  resolution), of which 3803 were independent (average redundancy 4.721, completeness = 96.0%,  $R_{\text{int}} = 2.41\%$ ,  $R_{\text{sig}} = 1.92\%$ ) and 3608 (94.87%) were greater than  $2\sigma(F^2)$ . The final cell constants of  $a = 7.6265(6) \text{ \AA}$ ,  $b = 8.5404(6) \text{ \AA}$ ,  $c = 16.1668(12) \text{ \AA}$ , volume =  $1053.00(14) \text{ \AA}^3$ , are based upon the refinement of the XYZ-centroids of 9879 reflections above  $20 \sigma(I)$  with  $5.039^\circ < 2\theta < 65.80^\circ$ . Data were corrected for absorption effects using the Multi-Scan method (SADABS). The ratio of minimum to maximum apparent transmission was 0.776.

The structure was solved and refined using the Bruker SHELXTL Software Package, using the space group  $P2_12_12_1$ , with  $Z = 4$  for the formula unit,  $C_9H_{11}NO_3S_2$ . The final anisotropic full-matrix least-squares refinement on  $F^2$  with 180 variables converged at  $R1 = 3.90\%$ , for the observed data and  $wR2 = 9.34\%$  for all data. The goodness-of-fit was 1.141. The largest peak in the final difference electron density synthesis was  $0.516 \text{ e}^-/\text{\AA}^3$  and the largest hole was  $-0.321 \text{ e}^-/\text{\AA}^3$  with an RMS deviation of  $0.069 \text{ e}^-/\text{\AA}^3$ . On the basis of the final model, the calculated density was  $1.547 \text{ g/cm}^3$  and  $F(000)$ , 512  $e^-$ .

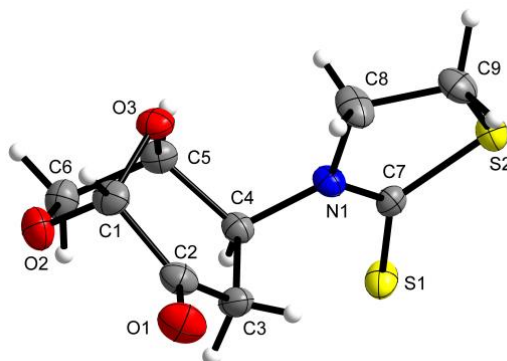

**Table S1. Sample and crystal data for 26**

|                               |                                                               |         |
|-------------------------------|---------------------------------------------------------------|---------|
| <b>Identification code</b>    | ZJW26                                                         |         |
| <b>Chemical formula</b>       | C <sub>9</sub> H <sub>11</sub> NO <sub>3</sub> S <sub>2</sub> |         |
| <b>Formula weight</b>         | 245.31 g/mol                                                  |         |
| <b>Temperature</b>            | 150(2) K                                                      |         |
| <b>Wavelength</b>             | 0.71073 Å                                                     |         |
| <b>Crystal system</b>         | orthorhombic                                                  |         |
| <b>Space group</b>            | P 2 <sub>1</sub> 2 <sub>1</sub> 2 <sub>1</sub>                |         |
| <b>Unit cell dimensions</b>   | a = 7.6265(6) Å                                               | α = 90° |
|                               | b = 8.5404(6) Å                                               | β = 90° |
|                               | c = 16.1668(12) Å                                             | γ = 90° |
| <b>Volume</b>                 | 1053.00(14) Å <sup>3</sup>                                    |         |
| <b>Z</b>                      | 4                                                             |         |
| <b>Density (calculated)</b>   | 1.547 g/cm <sup>3</sup>                                       |         |
| <b>Absorption coefficient</b> | 0.491 mm <sup>-1</sup>                                        |         |
| <b>F(000)</b>                 | 512                                                           |         |

## Table S2. Data collection and structure refinement for 26

|                                     |                                                                                                                                                               |
|-------------------------------------|---------------------------------------------------------------------------------------------------------------------------------------------------------------|
| Theta range for data collection     | 2.52 to 33.17°                                                                                                                                                |
| Index ranges                        | -11≤h≤11, -12≤k≤12, -23≤l≤24                                                                                                                                  |
| Reflections collected               | 17954                                                                                                                                                         |
| Independent reflections             | 3803 [R(int) = 0.0241]                                                                                                                                        |
| Coverage of independent reflections | 96.0%                                                                                                                                                         |
| Absorption correction               | Multi-Scan                                                                                                                                                    |
| Structure solution technique        | Intrinsic phasing                                                                                                                                             |
| Structure solution program          | SHELXT 2014/5 (Sheldrick, 2014)                                                                                                                               |
| Refinement method                   | Full-matrix least-squares on F <sup>2</sup>                                                                                                                   |
| Refinement program                  | SHELXL-2018/3 (Sheldrick, 2018)                                                                                                                               |
| Function minimized                  | $\Sigma w(F_o^2 - F_c^2)^2$                                                                                                                                   |
| Data / restraints / parameters      | 3803 / 0 / 180                                                                                                                                                |
| Goodness-of-fit on F <sup>2</sup>   | 1.141                                                                                                                                                         |
| $\Delta/\sigma_{\max}$              | 0.001                                                                                                                                                         |
| Final R indices                     | 3608 data; R1 = 0.0390, wR2 = 0.0909<br>I>2σ(I)<br>all data R1 = 0.0428, wR2 = 0.0934                                                                         |
| Weighting scheme                    | w=1/[σ <sup>2</sup> (F <sub>o</sub> <sup>2</sup> )+(0.0331P) <sup>2</sup> +0.7006P]<br>where P=(F <sub>o</sub> <sup>2</sup> +2F <sub>c</sub> <sup>2</sup> )/3 |
| Absolute structure parameter        | 0.014(19)                                                                                                                                                     |
| Largest diff. peak and hole         | 0.516 and -0.321 eÅ <sup>-3</sup>                                                                                                                             |
| R.M.S. deviation from mean          | 0.069 eÅ <sup>-3</sup>                                                                                                                                        |

**Table S3. Atomic coordinates and equivalent isotropic atomic displacement parameters ( $\text{\AA}^2$ ) for 26**

U(eq) is defined as one third of the trace of the orthogonalized  $U_{ij}$  tensor.

| x/a | y/b         | z/c        | U(eq)       |             |
|-----|-------------|------------|-------------|-------------|
| S1  | 0.49069(10) | 0.10475(7) | 0.47054(4)  | 0.02836(14) |
| S2  | 0.44453(8)  | 0.26515(7) | 0.63164(4)  | 0.02556(13) |
| O1  | 0.1833(3)   | 0.7305(3)  | 0.31897(14) | 0.0391(5)   |
| O2  | 0.5911(3)   | 0.7136(3)  | 0.27465(13) | 0.0344(4)   |
| O3  | 0.5845(2)   | 0.7279(2)  | 0.41466(12) | 0.0271(4)   |
| N1  | 0.4787(3)   | 0.4172(2)  | 0.49556(12) | 0.0217(4)   |
| C1  | 0.4889(4)   | 0.7643(3)  | 0.34276(16) | 0.0281(5)   |
| C2  | 0.3189(4)   | 0.6708(3)  | 0.34139(16) | 0.0268(5)   |
| C3  | 0.3352(4)   | 0.5006(3)  | 0.36439(18) | 0.0261(5)   |
| C4  | 0.5077(4)   | 0.4515(3)  | 0.40734(13) | 0.0218(4)   |
| C5  | 0.6520(3)   | 0.5743(3)  | 0.39613(16) | 0.0253(5)   |
| C6  | 0.7087(4)   | 0.5940(4)  | 0.30609(18) | 0.0312(5)   |
| C7  | 0.4725(3)   | 0.2711(2)  | 0.52426(13) | 0.0194(4)   |
| C8  | 0.4637(5)   | 0.5431(3)  | 0.55712(17) | 0.0353(6)   |
| C9  | 0.4014(4)   | 0.4734(3)  | 0.63817(17) | 0.0295(5)   |

**Table S4. Bond lengths ( $\text{\AA}$ ) for 26**

|        |          |        |          |
|--------|----------|--------|----------|
| S1-C7  | 1.671(2) | S2-C7  | 1.750(2) |
| S2-C9  | 1.812(3) | O1-C2  | 1.209(3) |
| O2-C1  | 1.418(3) | O2-C6  | 1.451(4) |
| O3-C1  | 1.407(3) | O3-C5  | 1.441(3) |
| N1-C7  | 1.332(3) | N1-C8  | 1.469(3) |
| N1-C4  | 1.473(3) | C1-C2  | 1.523(4) |
| C1-H1  | 0.97(3)  | C2-C3  | 1.505(4) |
| C3-C4  | 1.546(4) | C3-H3B | 0.93(5)  |
| C3-H3A | 0.89(4)  | C4-C5  | 1.531(4) |
| C4-H4  | 0.94(3)  | C5-C6  | 1.528(4) |
| C5-H5  | 0.90(4)  | C6-H6B | 0.98(4)  |
| C6-H6A | 0.97(4)  | C8-C9  | 1.515(4) |
| C8-H8B | 0.99(4)  | C8-H8A | 0.89(4)  |
| C9-H9B | 0.98(4)  | C9-H9A | 0.99(4)  |

**Table S5. Bond angles (°) for 26**

|            |            |            |            |
|------------|------------|------------|------------|
| C7-S2-C9   | 92.95(12)  | C1-O2-C6   | 106.4(2)   |
| C1-O3-C5   | 102.39(18) | C7-N1-C8   | 116.5(2)   |
| C7-N1-C4   | 121.92(18) | C8-N1-C4   | 121.48(19) |
| O3-C1-O2   | 106.8(2)   | O3-C1-C2   | 109.7(2)   |
| O2-C1-C2   | 107.3(2)   | O3-C1-H1   | 109.(2)    |
| O2-C1-H1   | 112.(2)    | C2-C1-H1   | 112.(2)    |
| O1-C2-C3   | 123.5(3)   | O1-C2-C1   | 120.7(3)   |
| C3-C2-C1   | 115.6(2)   | C2-C3-C4   | 116.3(2)   |
| C2-C3-H3B  | 107.(3)    | C4-C3-H3B  | 108.(3)    |
| C2-C3-H3A  | 105.(2)    | C4-C3-H3A  | 111.(2)    |
| H3B-C3-H3A | 109.(4)    | N1-C4-C5   | 111.03(19) |
| N1-C4-C3   | 111.2(2)   | C5-C4-C3   | 111.89(19) |
| N1-C4-H4   | 108.(2)    | C5-C4-H4   | 106.3(19)  |
| C3-C4-H4   | 108.(2)    | O3-C5-C6   | 101.5(2)   |
| O3-C5-C4   | 110.0(2)   | C6-C5-C4   | 113.1(2)   |
| O3-C5-H5   | 109.(2)    | C6-C5-H5   | 112.(2)    |
| C4-C5-H5   | 111.(2)    | O2-C6-C5   | 103.7(2)   |
| O2-C6-H6B  | 110.(2)    | C5-C6-H6B  | 111.(2)    |
| O2-C6-H6A  | 108.(2)    | C5-C6-H6A  | 110.(2)    |
| H6B-C6-H6A | 114.(3)    | N1-C7-S1   | 127.77(17) |
| N1-C7-S2   | 112.14(16) | S1-C7-S2   | 120.08(13) |
| N1-C8-C9   | 108.8(2)   | N1-C8-H8B  | 109.(3)    |
| C9-C8-H8B  | 113.(3)    | N1-C8-H8A  | 103.(2)    |
| C9-C8-H8A  | 109.(2)    | H8B-C8-H8A | 115.(3)    |
| C8-C9-S2   | 106.14(18) | C8-C9-H9B  | 110.(3)    |
| S2-C9-H9B  | 107.(3)    | C8-C9-H9A  | 112.(3)    |
| S2-C9-H9A  | 108.(3)    | H9B-C9-H9A | 113.(4)    |

**Table S6. Anisotropic atomic displacement parameters ( $\text{\AA}^2$ ) for 26**

The anisotropic atomic displacement factor exponent takes the form:  $-2\pi^2 [h^2 a^{*2} U_{11} + \dots + 2 h k a^* b^* U_{12}]$

|    | $U_{11}$   | $U_{22}$   | $U_{33}$   | $U_{23}$   | $U_{13}$   | $U_{12}$   |
|----|------------|------------|------------|------------|------------|------------|
| S1 | 0.0365(3)  | 0.0188(2)  | 0.0298(3)  | -0.0038(2) | 0.0094(3)  | -0.0026(2) |
| S2 | 0.0286(3)  | 0.0258(3)  | 0.0223(2)  | 0.0014(2)  | 0.0027(2)  | 0.0029(2)  |
| O1 | 0.0350(10) | 0.0422(12) | 0.0401(11) | 0.0002(10) | 0.0097(9)  | 0.0120(10) |
| O2 | 0.0411(11) | 0.0337(10) | 0.0283(9)  | 0.0083(8)  | 0.0034(8)  | 0.0005(9)  |
| O3 | 0.0321(9)  | 0.0204(7)  | 0.0287(8)  | 0.0021(7)  | 0.0053(7)  | 0.0023(7)  |
| N1 | 0.0269(10) | 0.0179(7)  | 0.0202(8)  | 0.0029(6)  | 0.0007(7)  | 0.0028(7)  |
| C1 | 0.0349(12) | 0.0180(9)  | 0.0313(11) | 0.0012(8)  | 0.0030(10) | 0.0006(9)  |
| C2 | 0.0282(11) | 0.0284(11) | 0.0239(10) | 0.0047(9)  | 0.0023(9)  | 0.0051(9)  |
| C3 | 0.0263(11) | 0.0258(11) | 0.0262(11) | 0.0002(9)  | 0.0053(10) | 0.0046(9)  |
| C4 | 0.0264(10) | 0.0187(8)  | 0.0202(9)  | 0.0016(7)  | 0.0003(8)  | 0.0017(8)  |
| C5 | 0.0234(11) | 0.0241(11) | 0.0284(11) | 0.0004(9)  | 0.0019(9)  | 0.0030(9)  |
| C6 | 0.0292(13) | 0.0320(13) | 0.0325(13) | 0.0016(11) | 0.0052(10) | 0.0007(11) |
| C7 | 0.0164(8)  | 0.0189(8)  | 0.0230(9)  | 0.0010(7)  | 0.0014(7)  | 0.0013(7)  |
| C8 | 0.057(2)   | 0.0227(11) | 0.0261(11) | -0.0068(9) | 0.0070(12) | 0.0026(12) |
| C9 | 0.0379(13) | 0.0276(11) | 0.0230(11) | -0.0063(9) | 0.0005(10) | 0.0056(10) |

**Table S7. Hydrogen atomic coordinates and isotropic atomic displacement parameters ( $\text{\AA}^2$ ) for 26**

|     | x/a      | y/b      | z/c      | U(eq)     |
|-----|----------|----------|----------|-----------|
| H1  | 0.468(5) | 0.876(4) | 0.341(2) | 0.032(9)  |
| H3B | 0.325(6) | 0.443(6) | 0.316(3) | 0.054(13) |
| H3A | 0.243(5) | 0.481(4) | 0.396(2) | 0.028(9)  |
| H4  | 0.549(4) | 0.360(4) | 0.382(2) | 0.023(8)  |
| H5  | 0.743(5) | 0.555(4) | 0.430(2) | 0.027(8)  |
| H6B | 0.691(5) | 0.497(5) | 0.275(2) | 0.038(11) |
| H6A | 0.827(5) | 0.635(5) | 0.304(2) | 0.035(10) |
| H8B | 0.383(6) | 0.624(5) | 0.535(3) | 0.046(11) |
| H8A | 0.574(5) | 0.574(5) | 0.563(2) | 0.033(10) |
| H9B | 0.274(6) | 0.486(5) | 0.644(3) | 0.049(12) |
| H9A | 0.467(6) | 0.515(5) | 0.686(3) | 0.054(13) |



ZJW23 ~19 mg in ~0.67 mL DMSO  
hemiketal

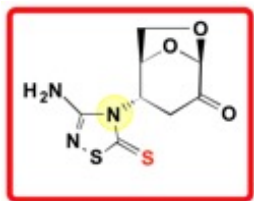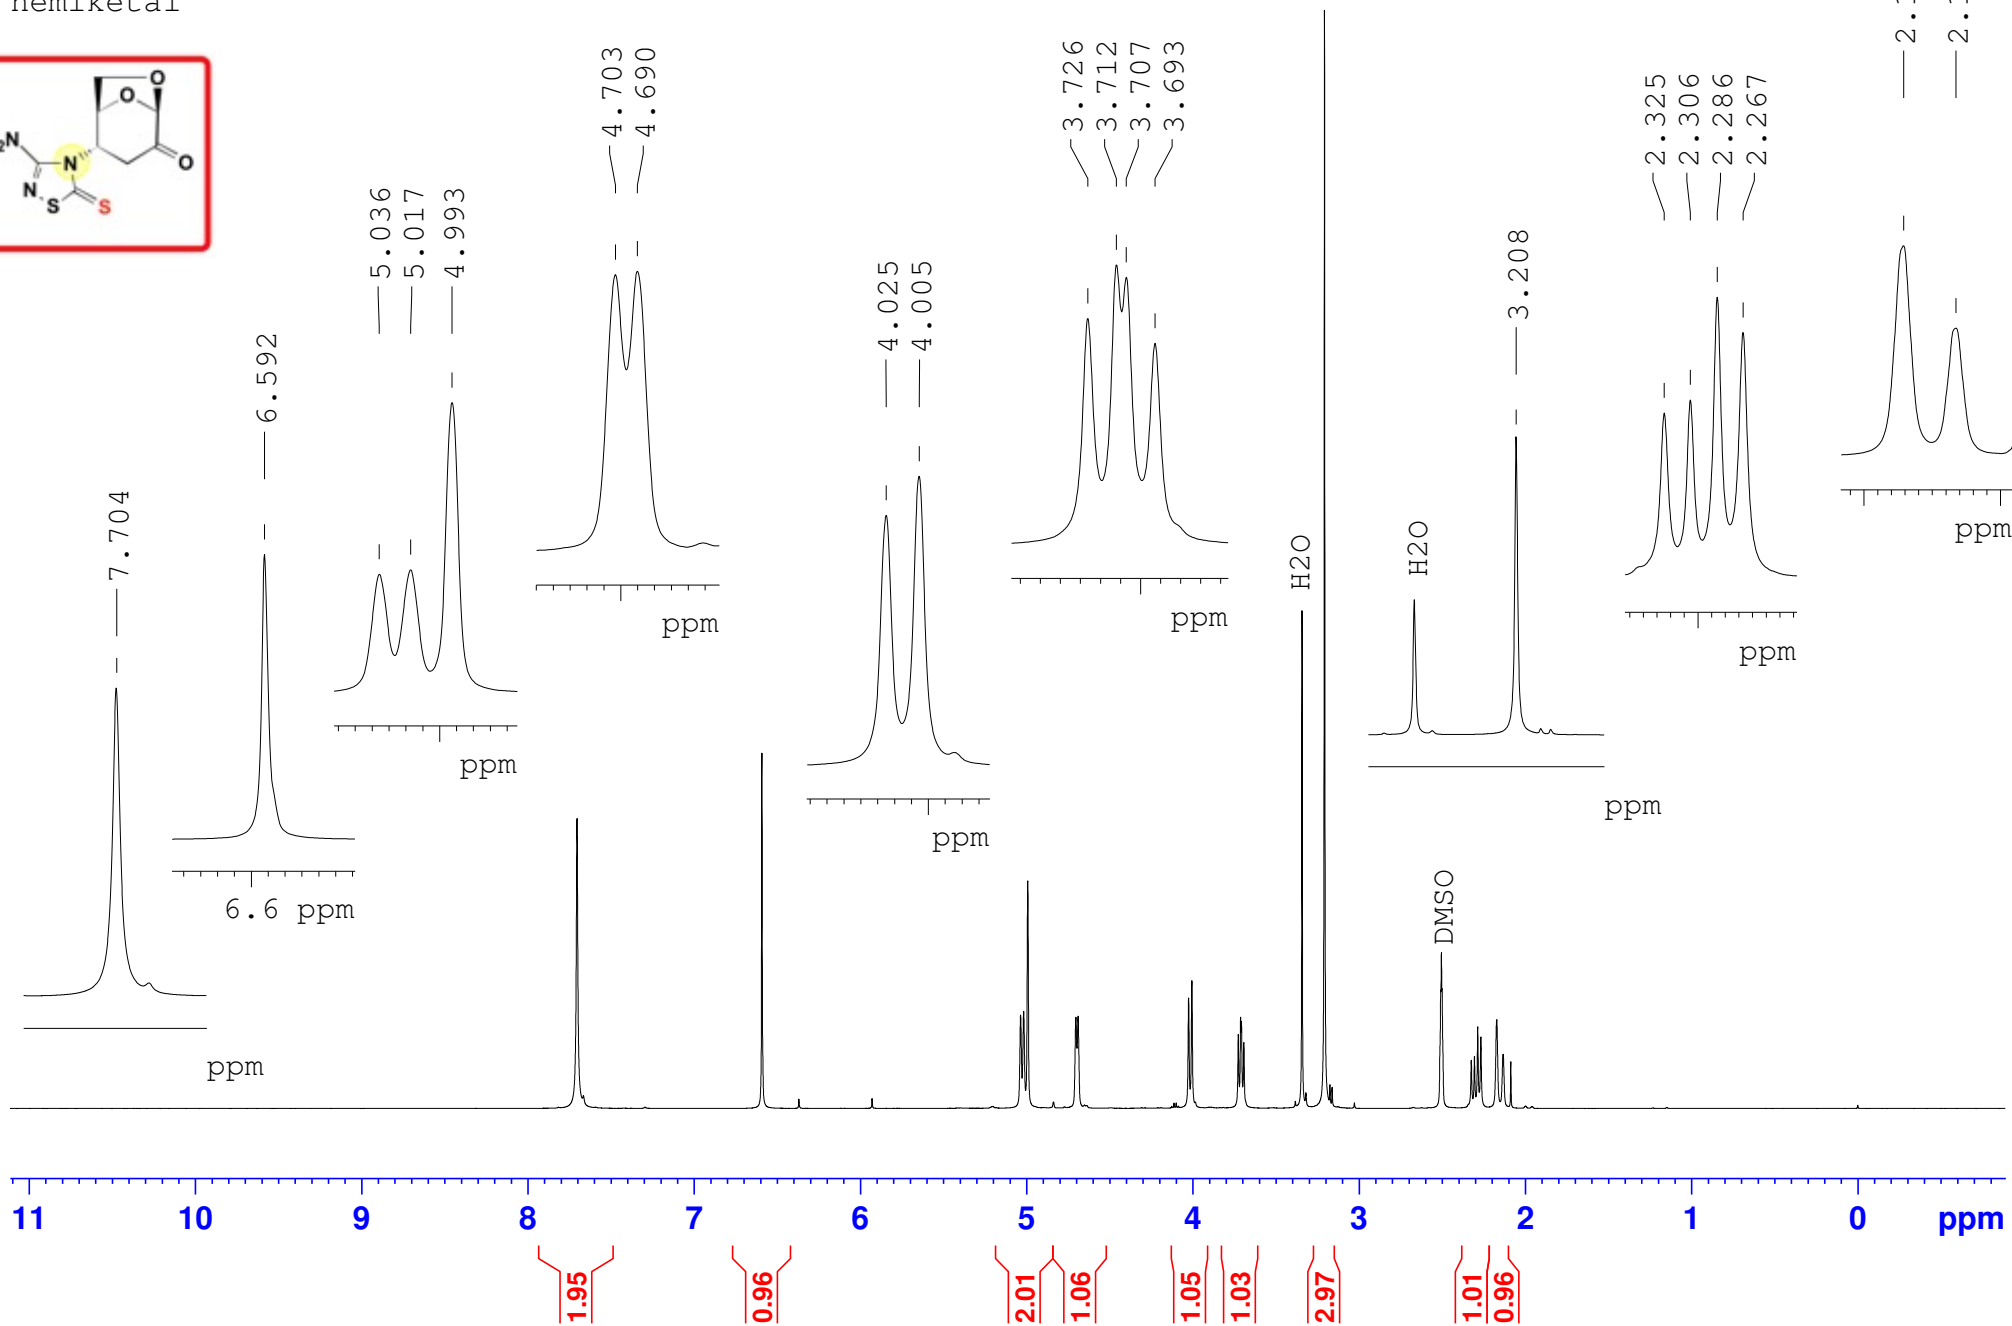

ZJW-23 ~18 mg in ~0.67 mL DMSO  
hemiketal

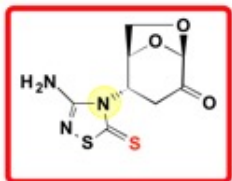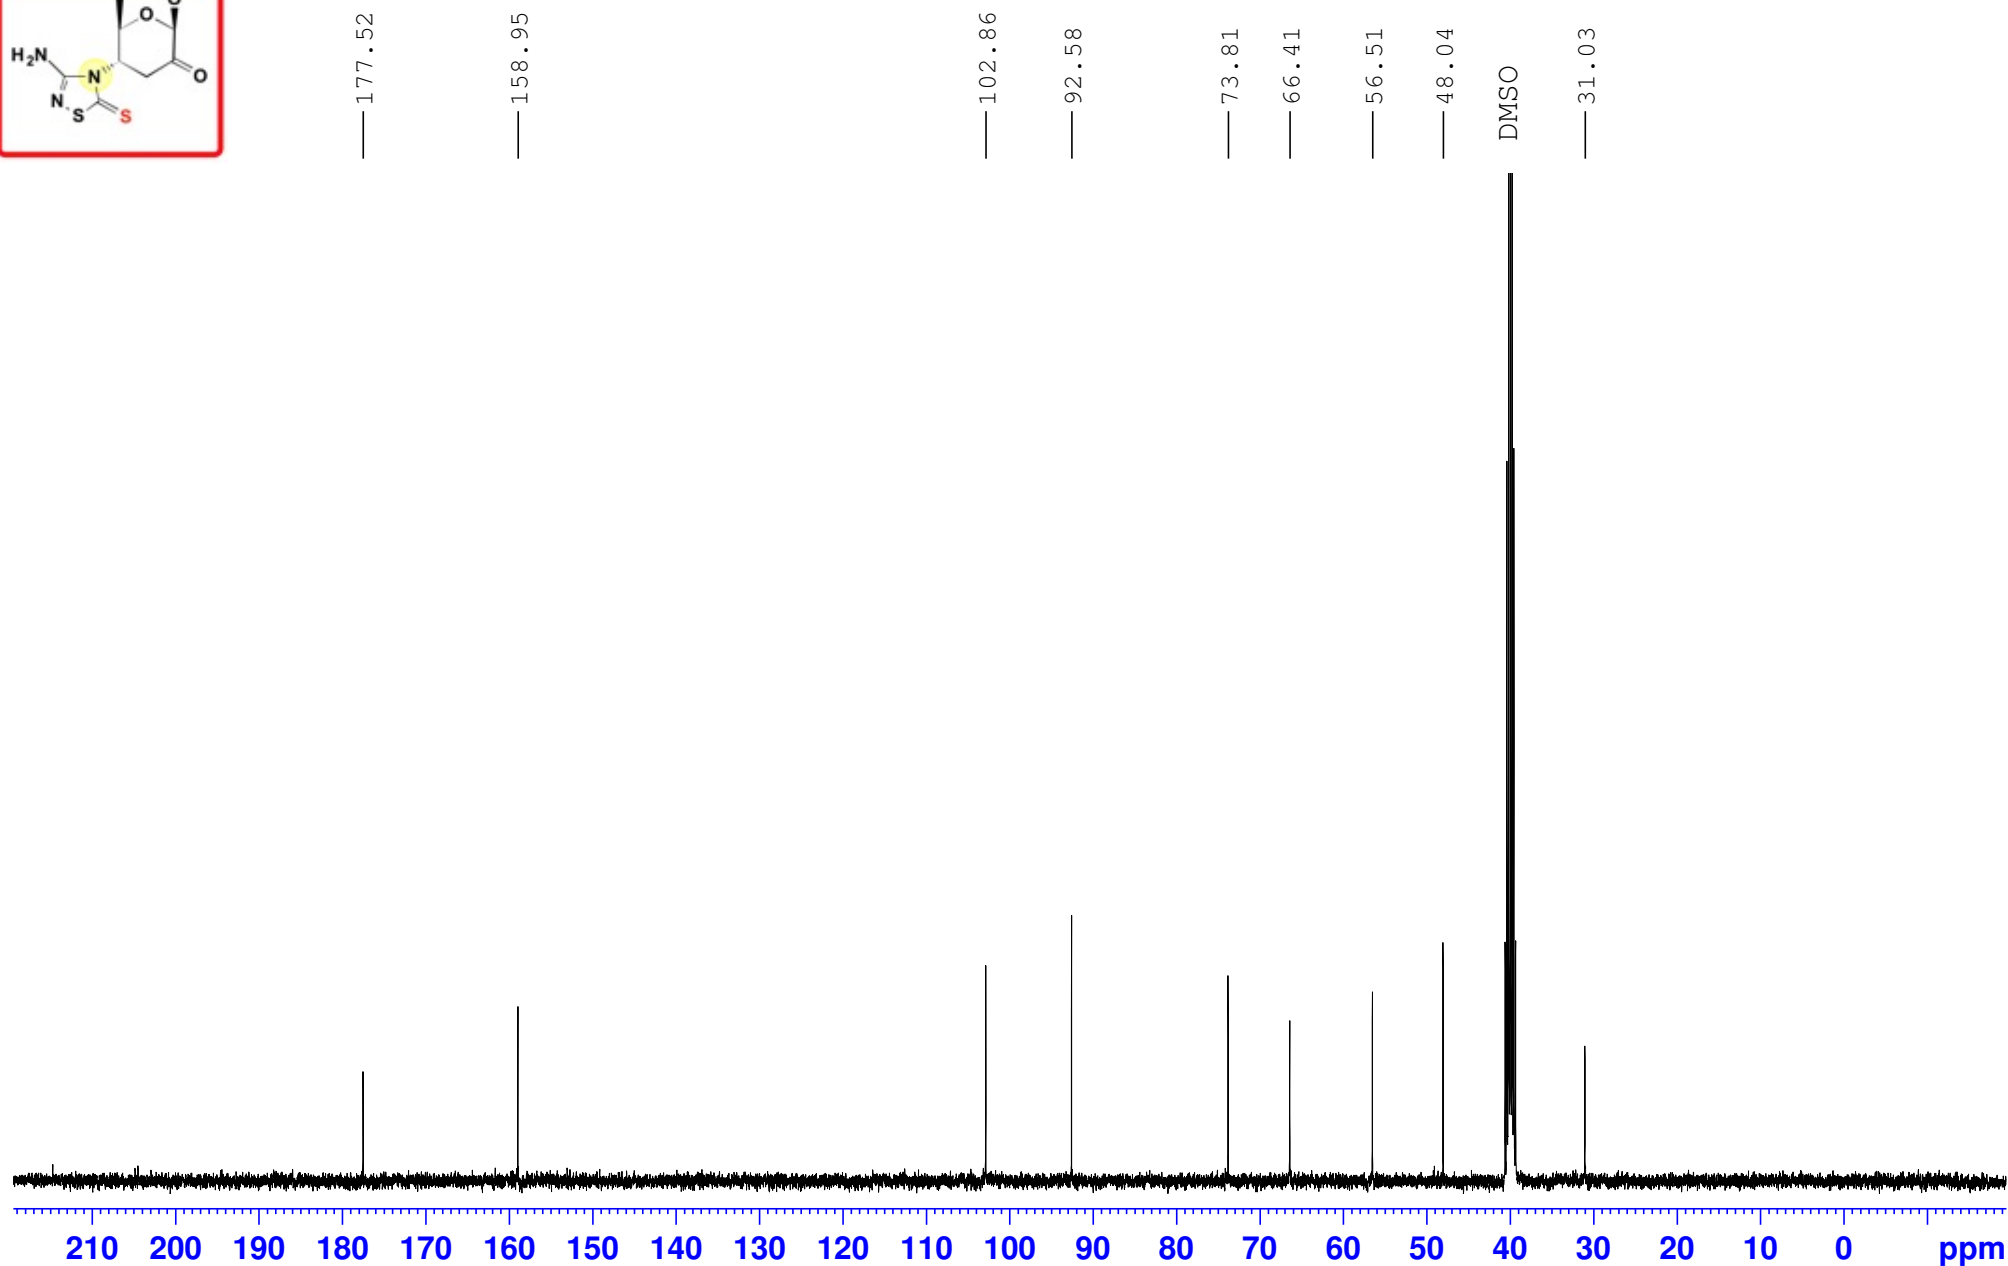

ZJW23\_21Nov2023 12 1 /opt/nmrdata/user/Mencer

ZJW23\_21Nov2023 12 1 /opt/nmrdata/user/Mencer

ale : 6.727 ZJW23\_21Nov2023 14 1 /opt/nmrdata/user/Mencer

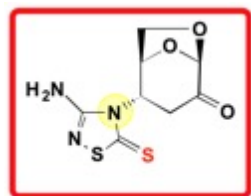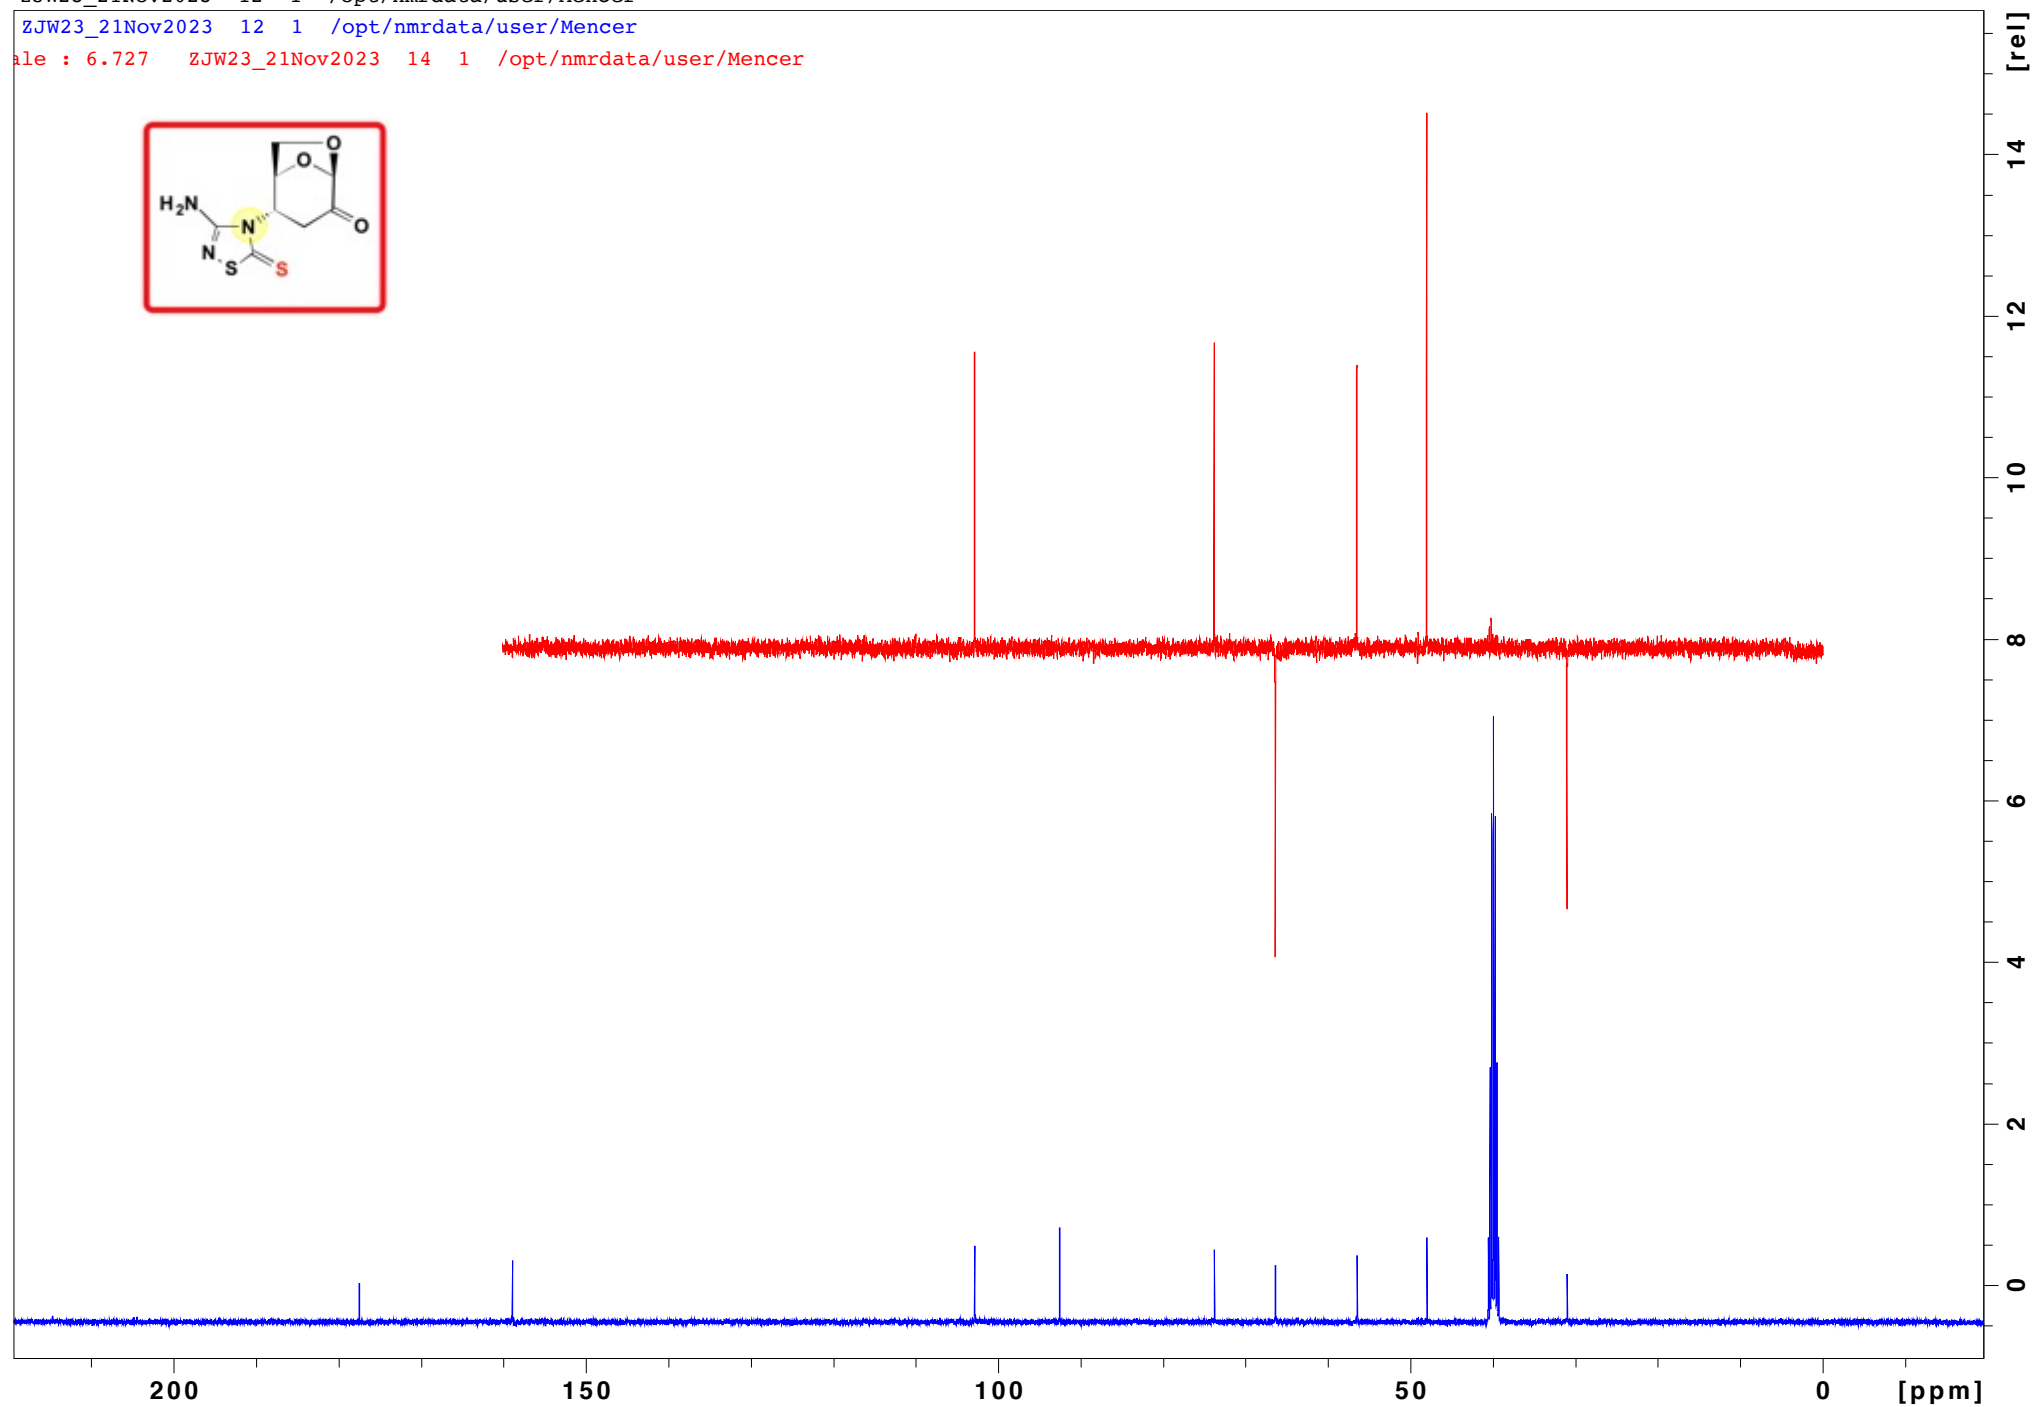

ZJW-23 ~18 mg in ~0.67 mL DMSO  
hemiketal

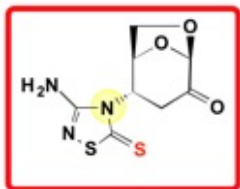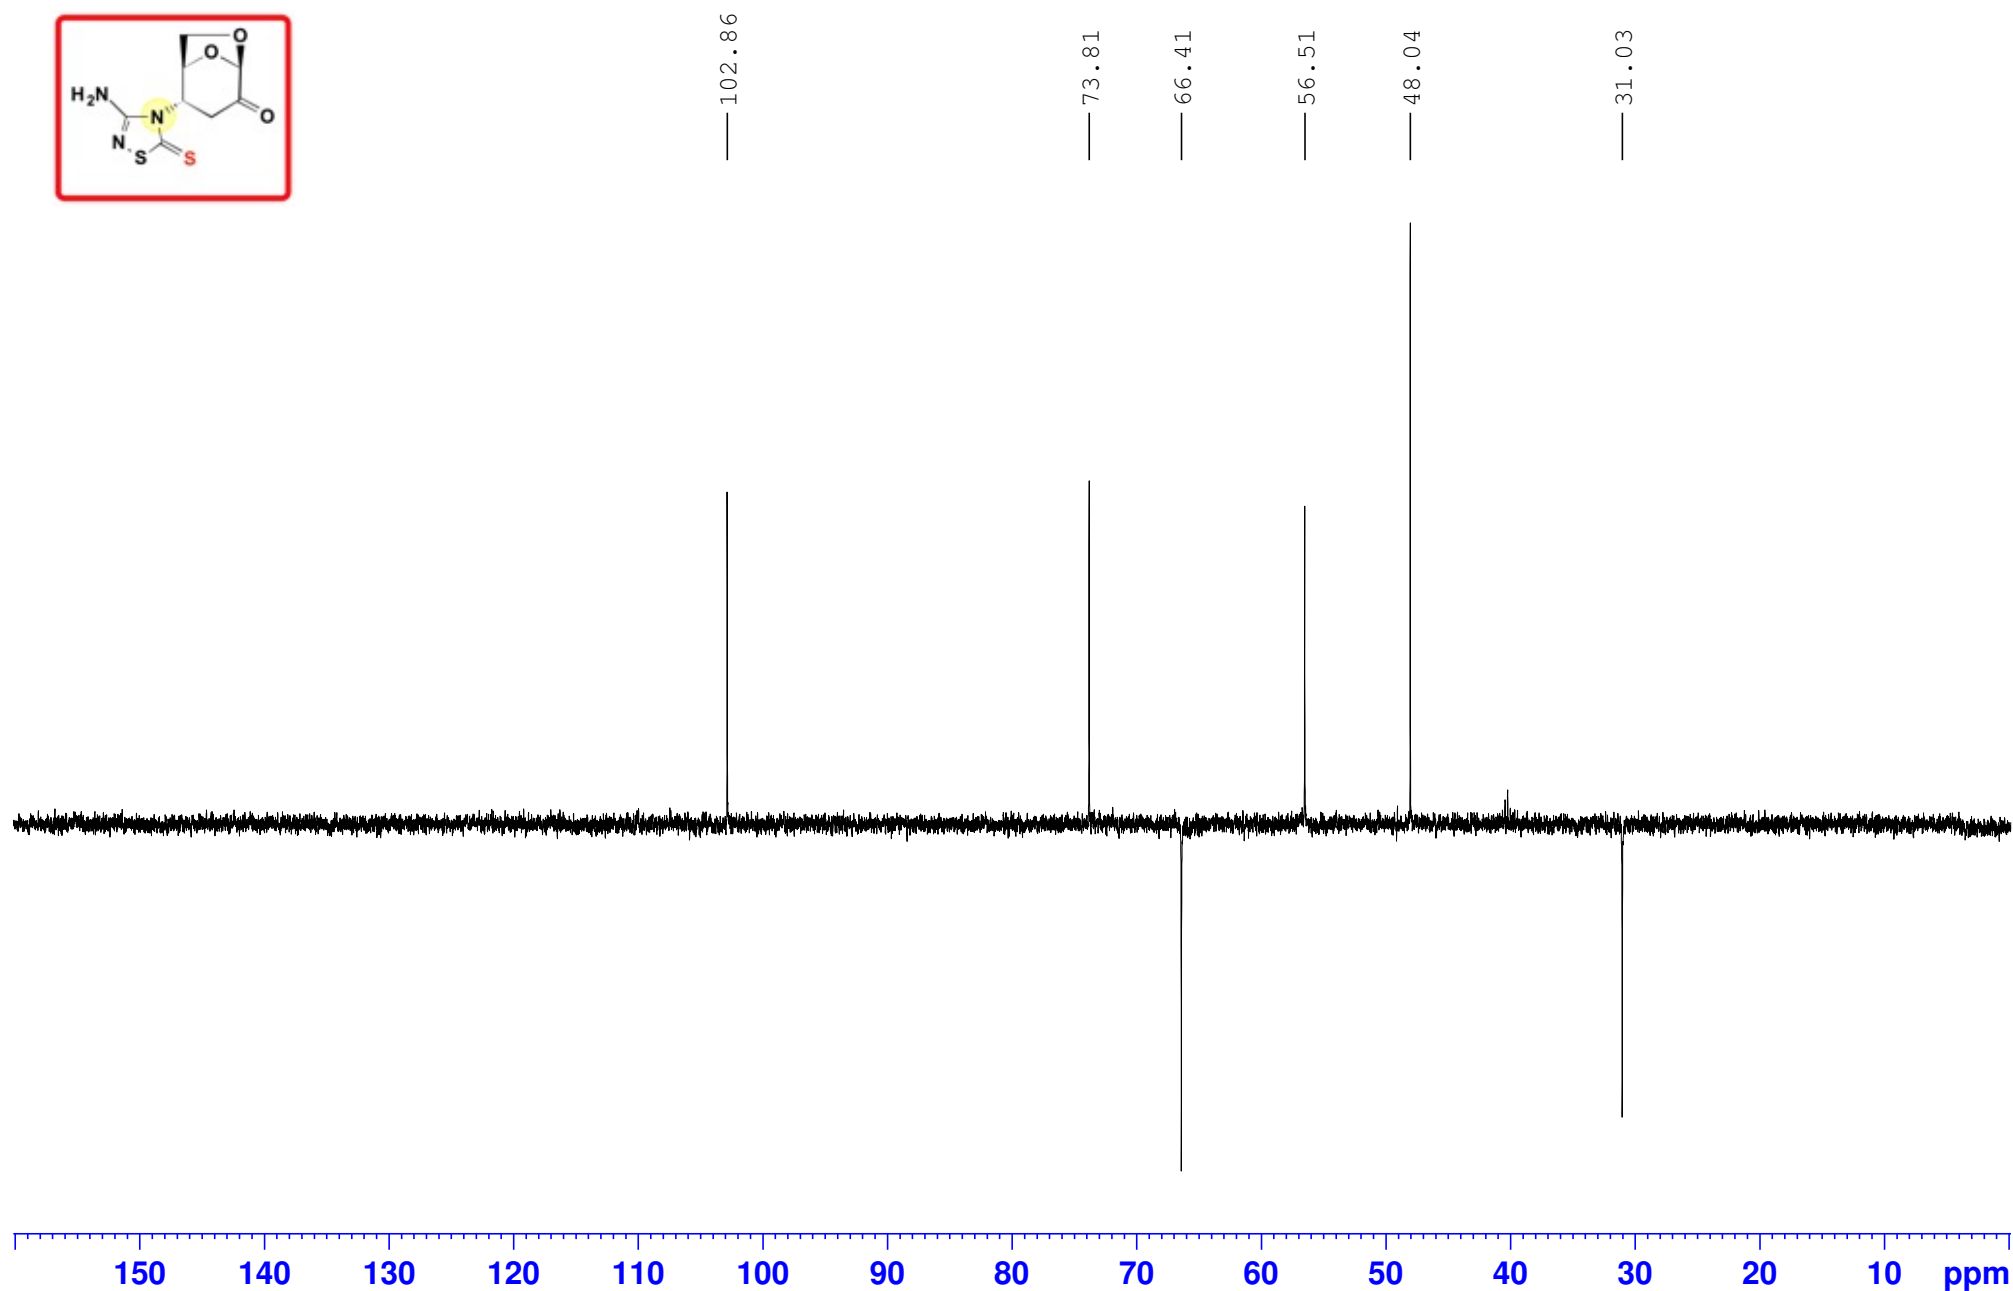

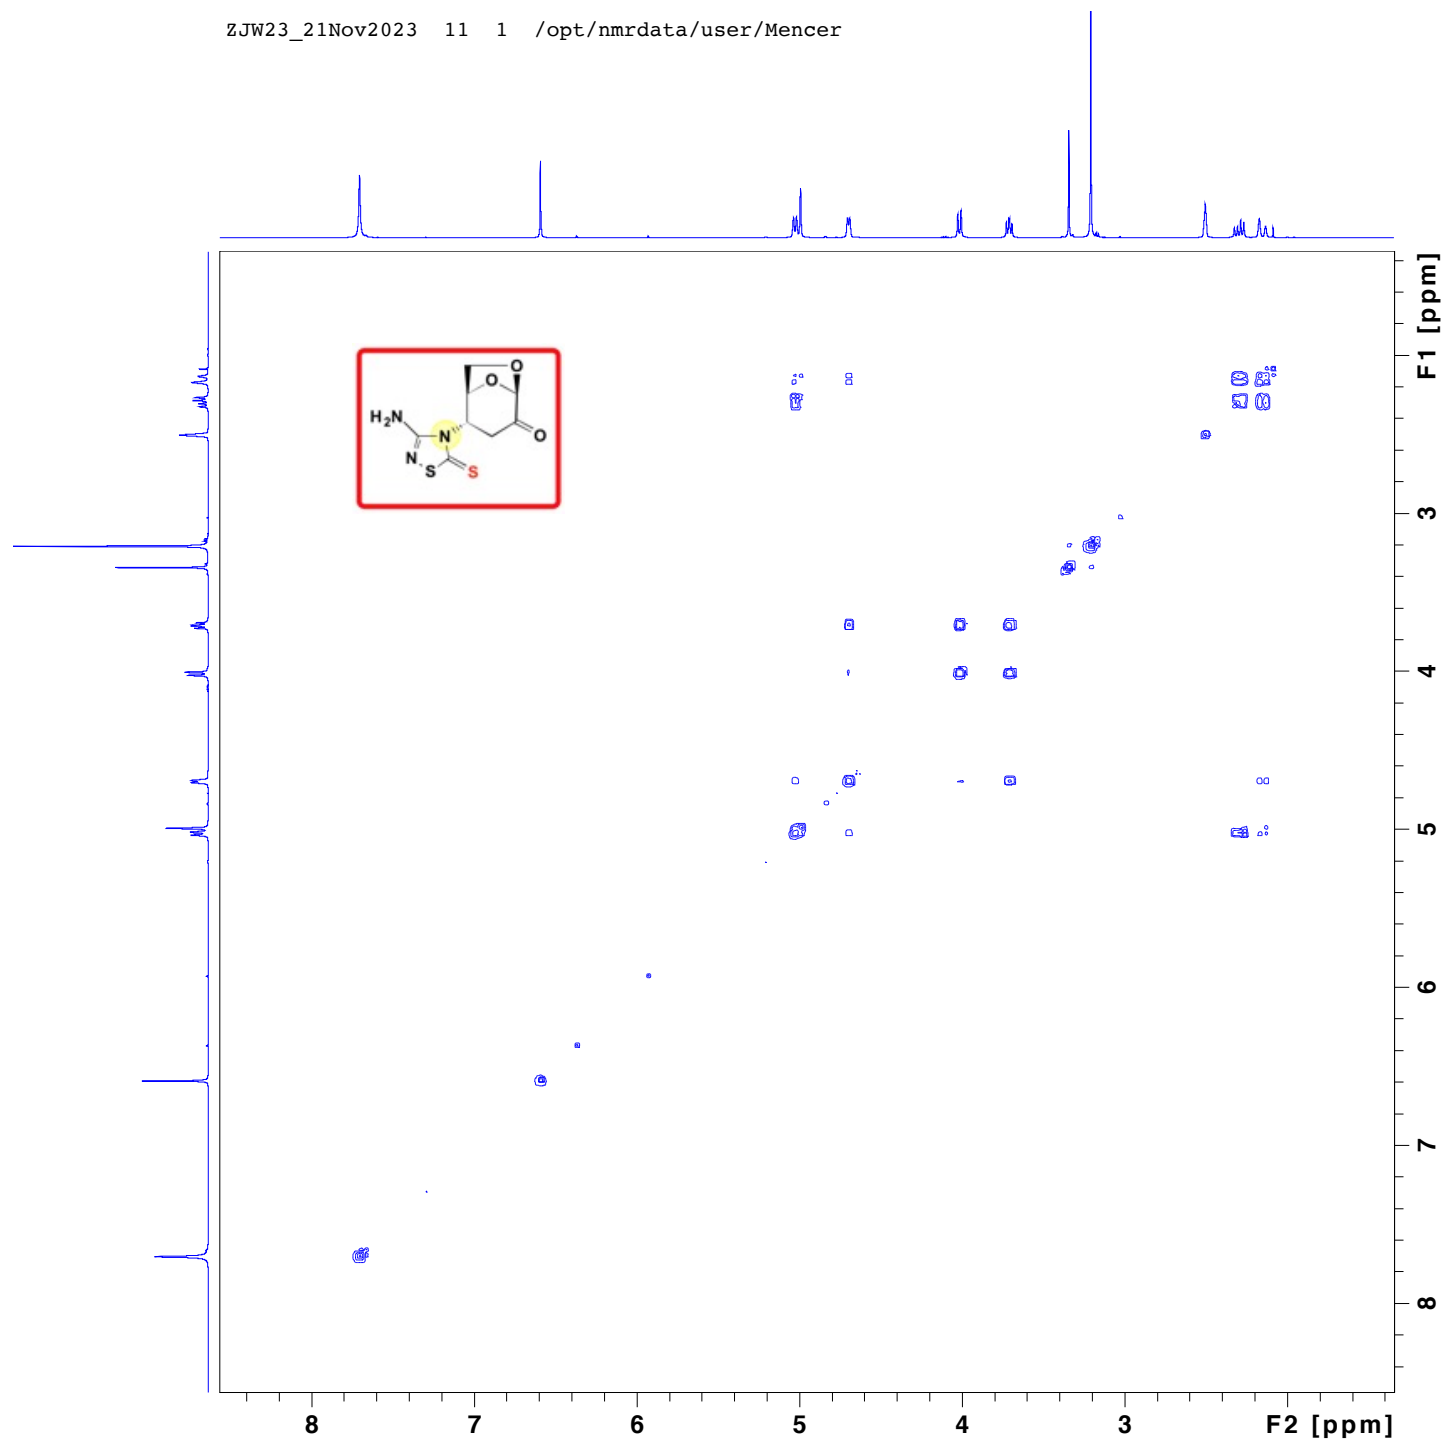

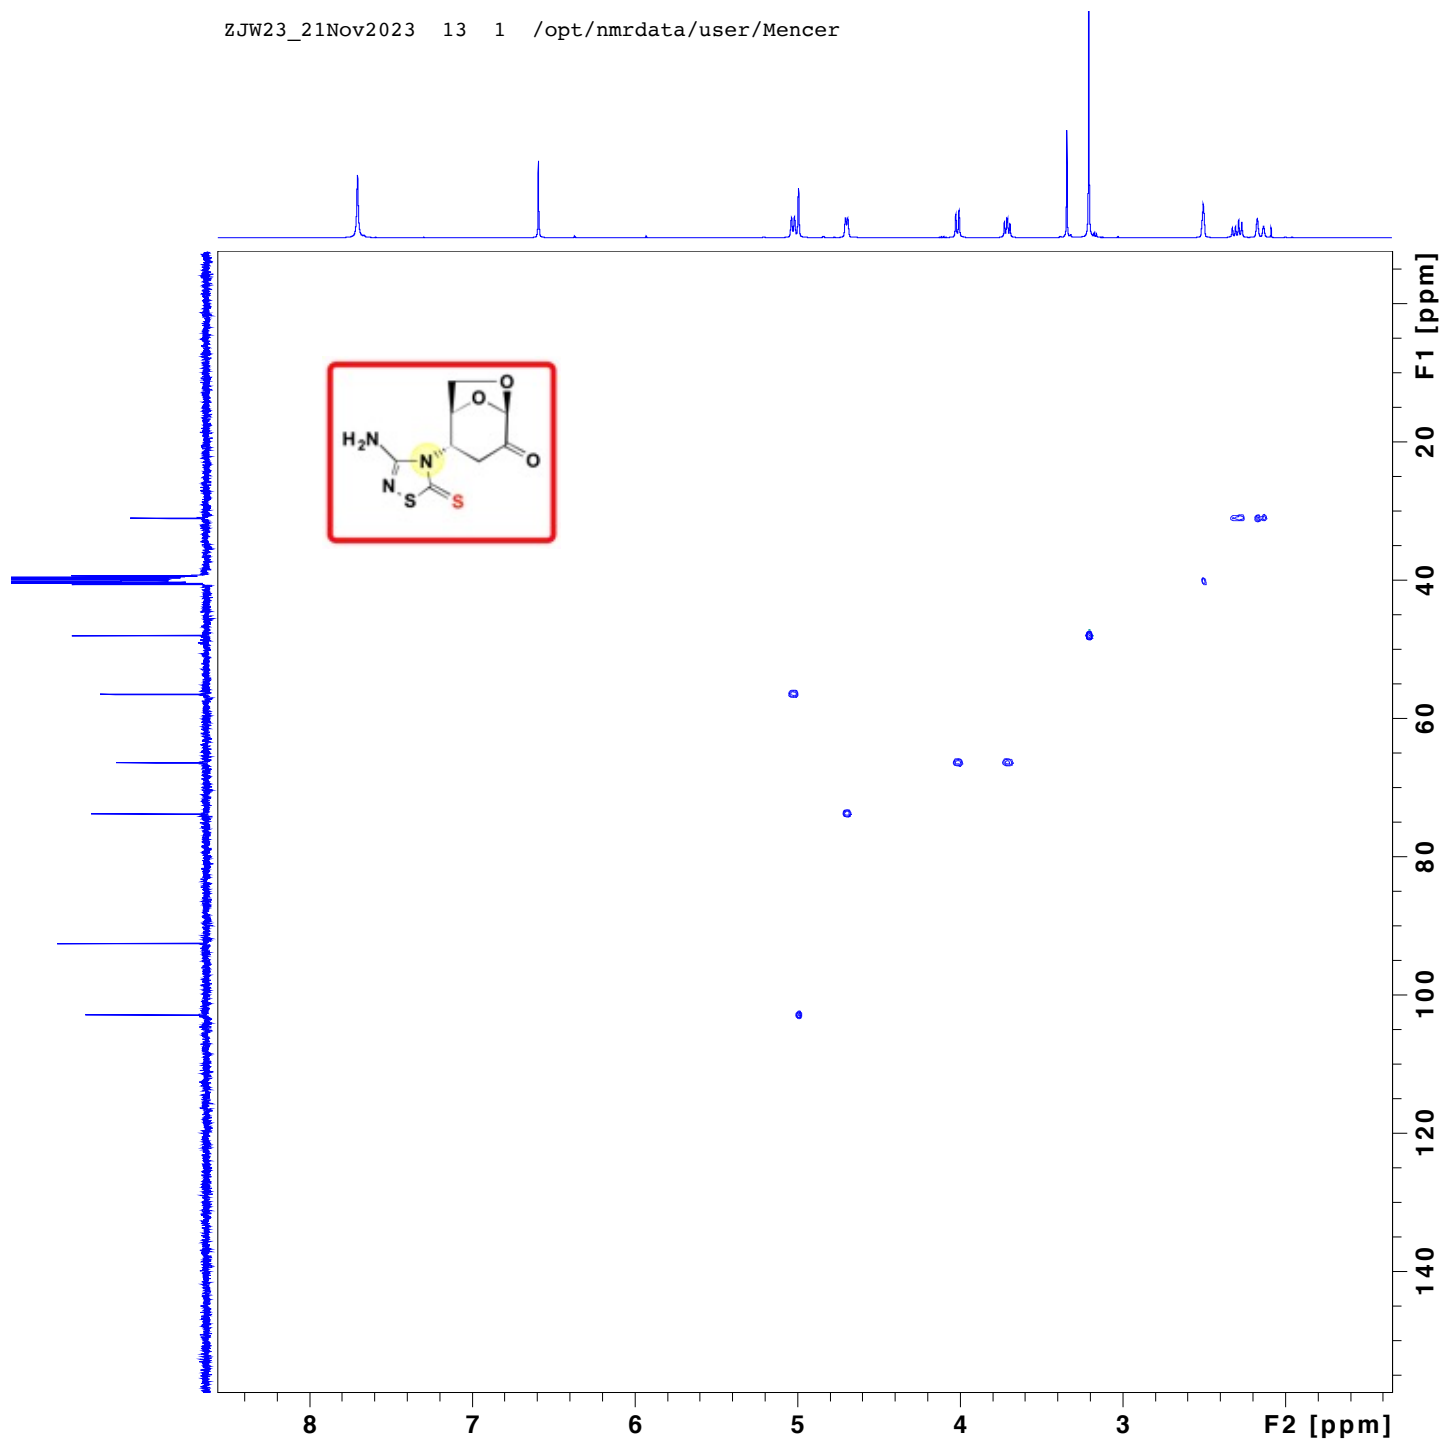

ZJW-26 ~19 mg in ~0.67 mL CDCl<sub>3</sub>

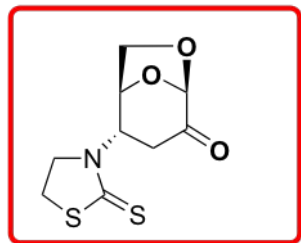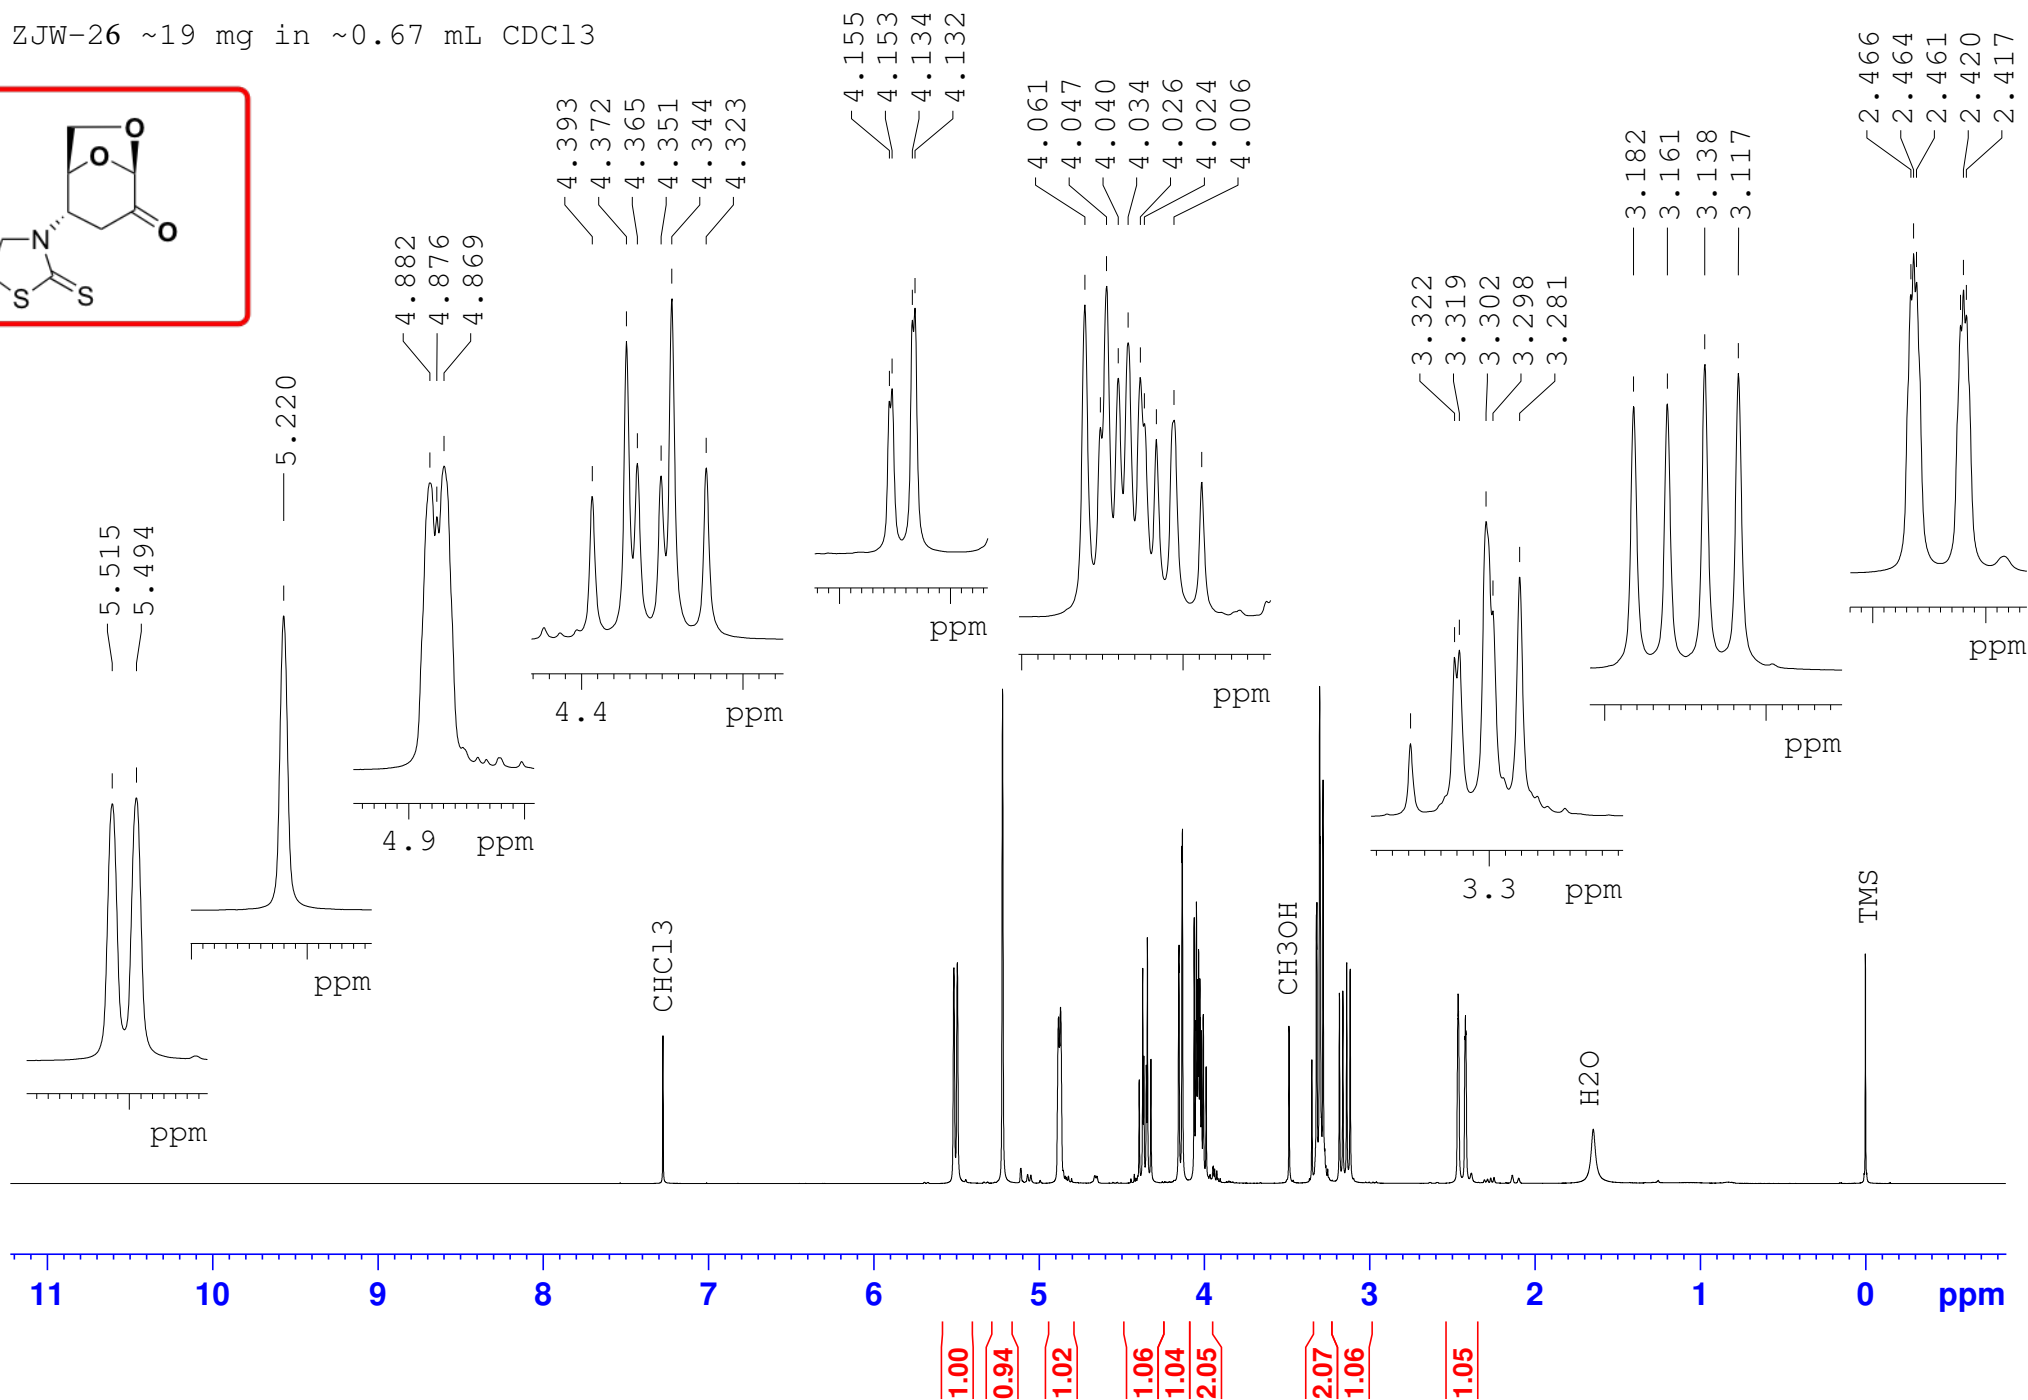

ZJW-26 ~19 mg in ~0.67 mL CDCl<sub>3</sub>

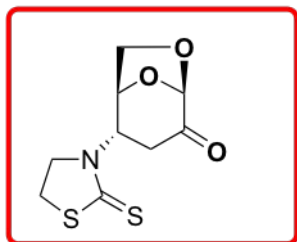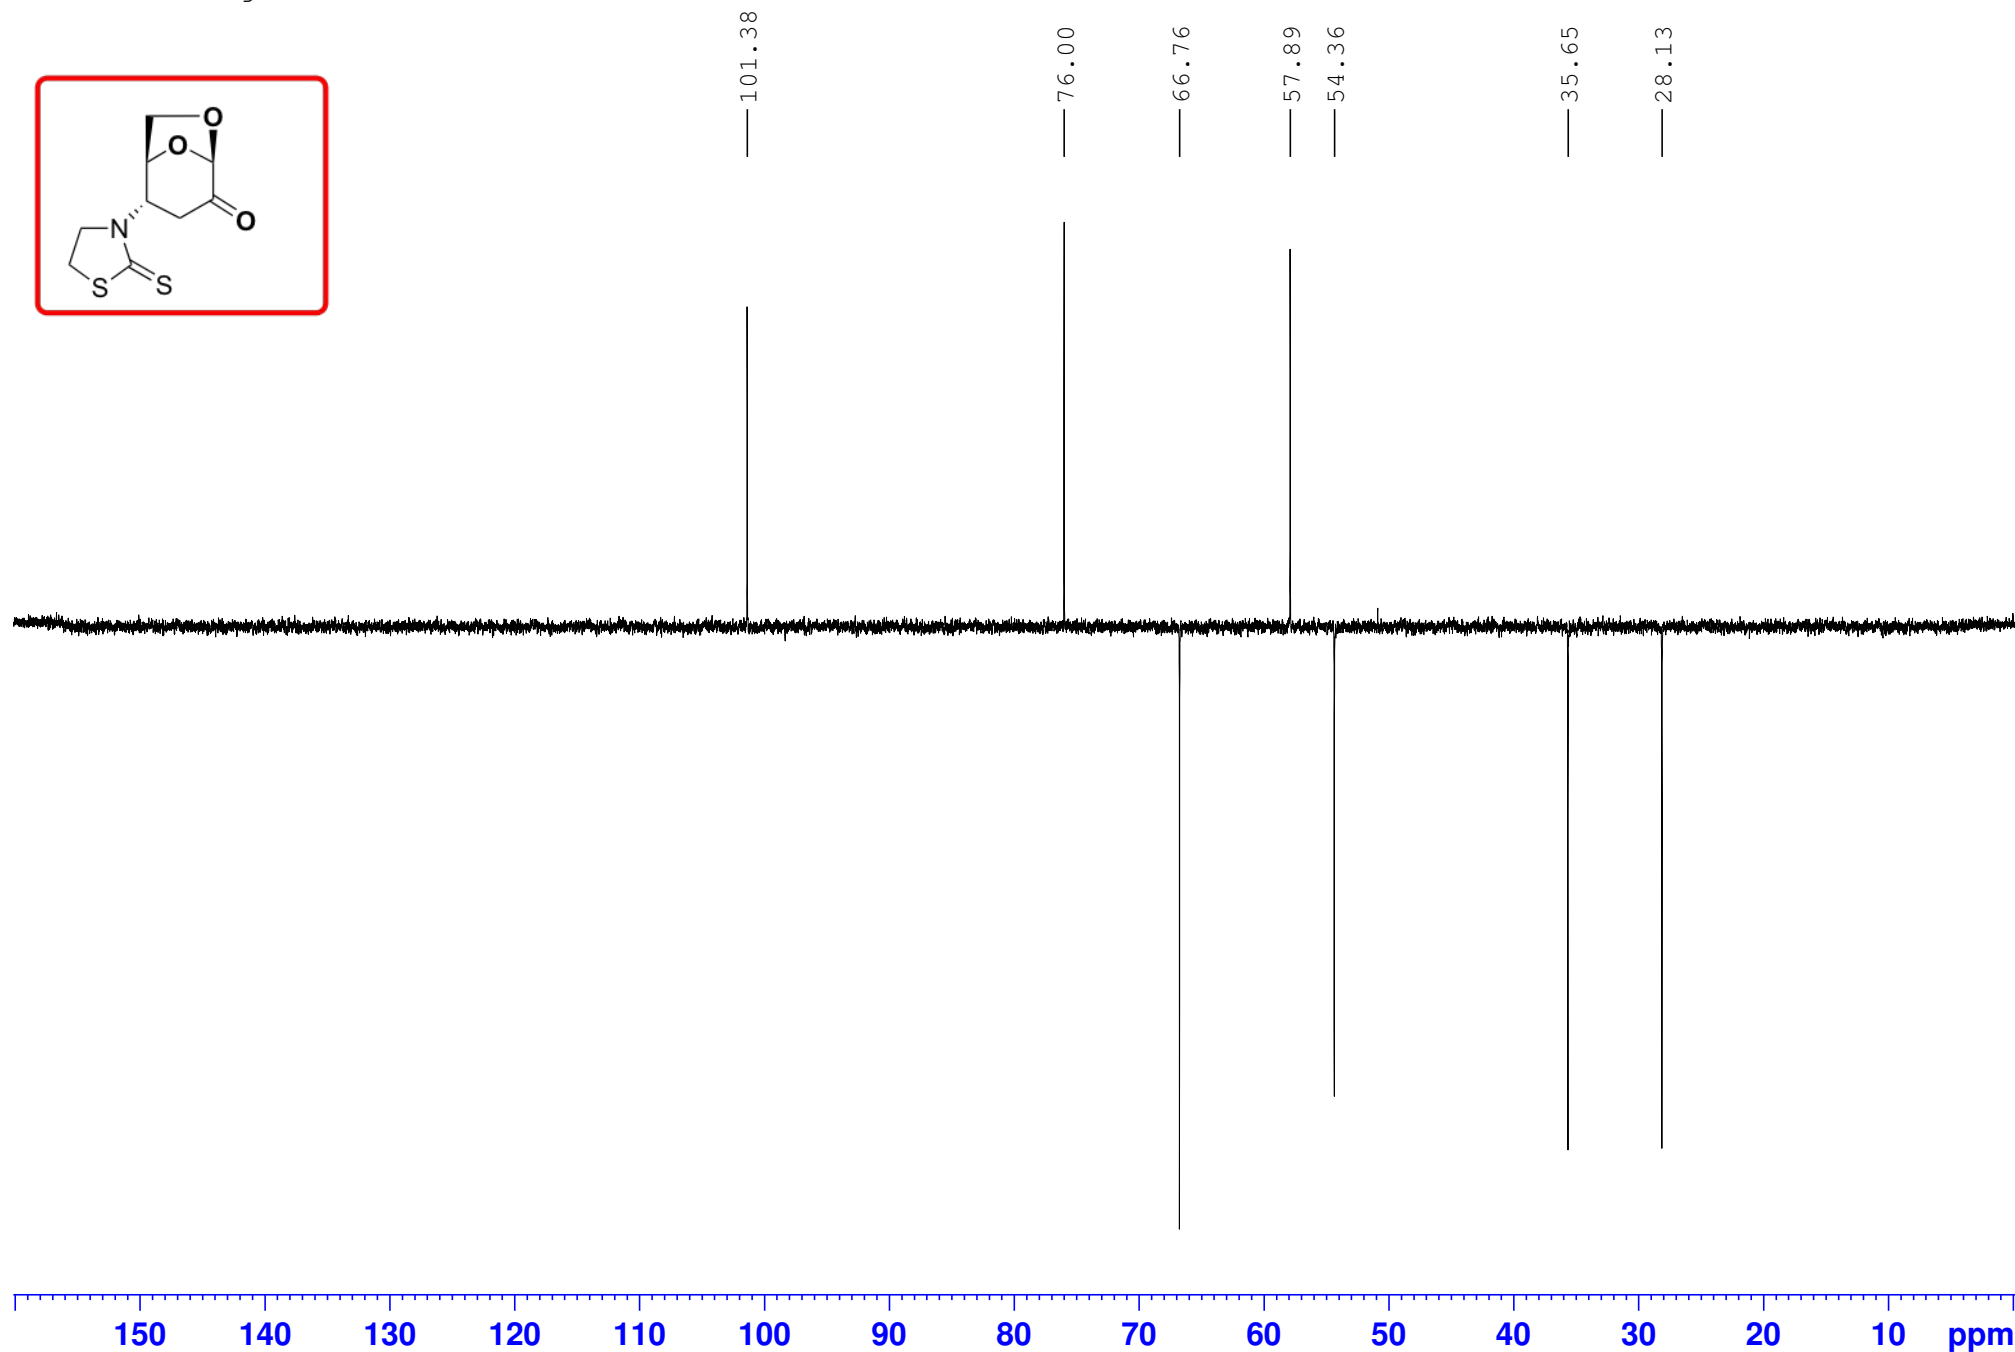



ZJW-26 ~19 mg in ~0.67 mL CDCl<sub>3</sub>

198.35  
198.28

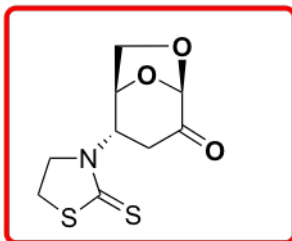

101.38

CDCl<sub>3</sub> 76.00

66.75

57.89

54.36

35.65

28.12

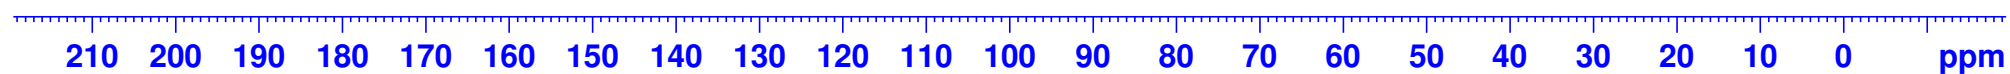

ZJW-26 ~19 mg in ~0.67 mL CDCl<sub>3</sub>

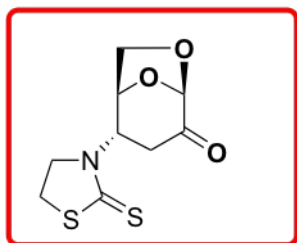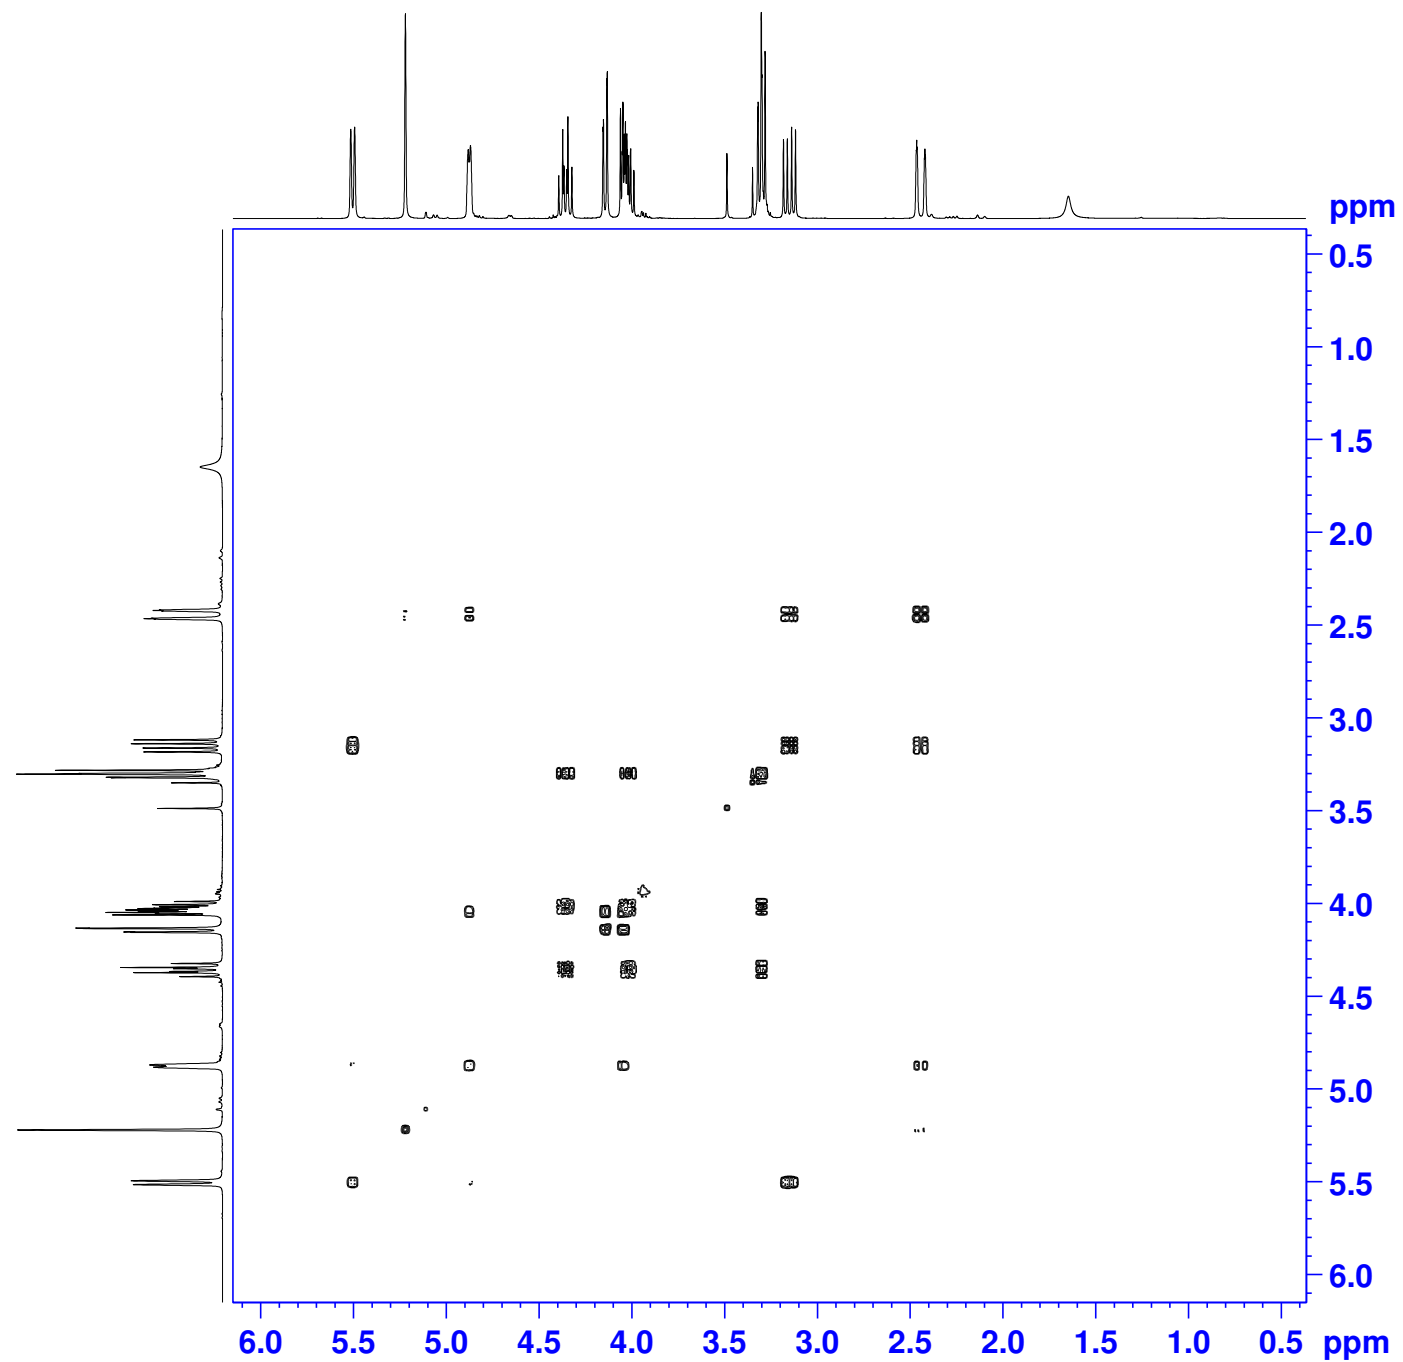

ZJW-26 ~19 mg in ~0.67 mL CDCl<sub>3</sub>

198.35  
198.28

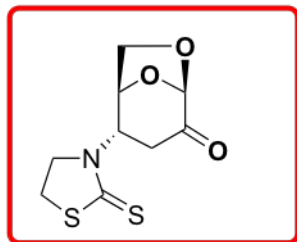

101.38

CDCl<sub>3</sub>

76.00

66.75

57.89

54.36

35.65

28.12

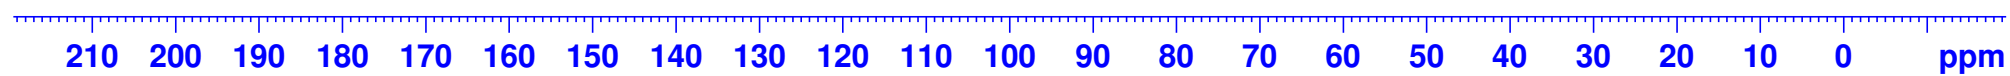

ZJW26\_20October2023 12 1 /opt/nmrdata/user/Mencer

ZJW26\_20October2023 12 1 /opt/nmrdata/user/Mencer

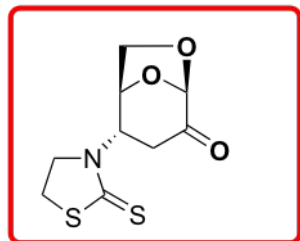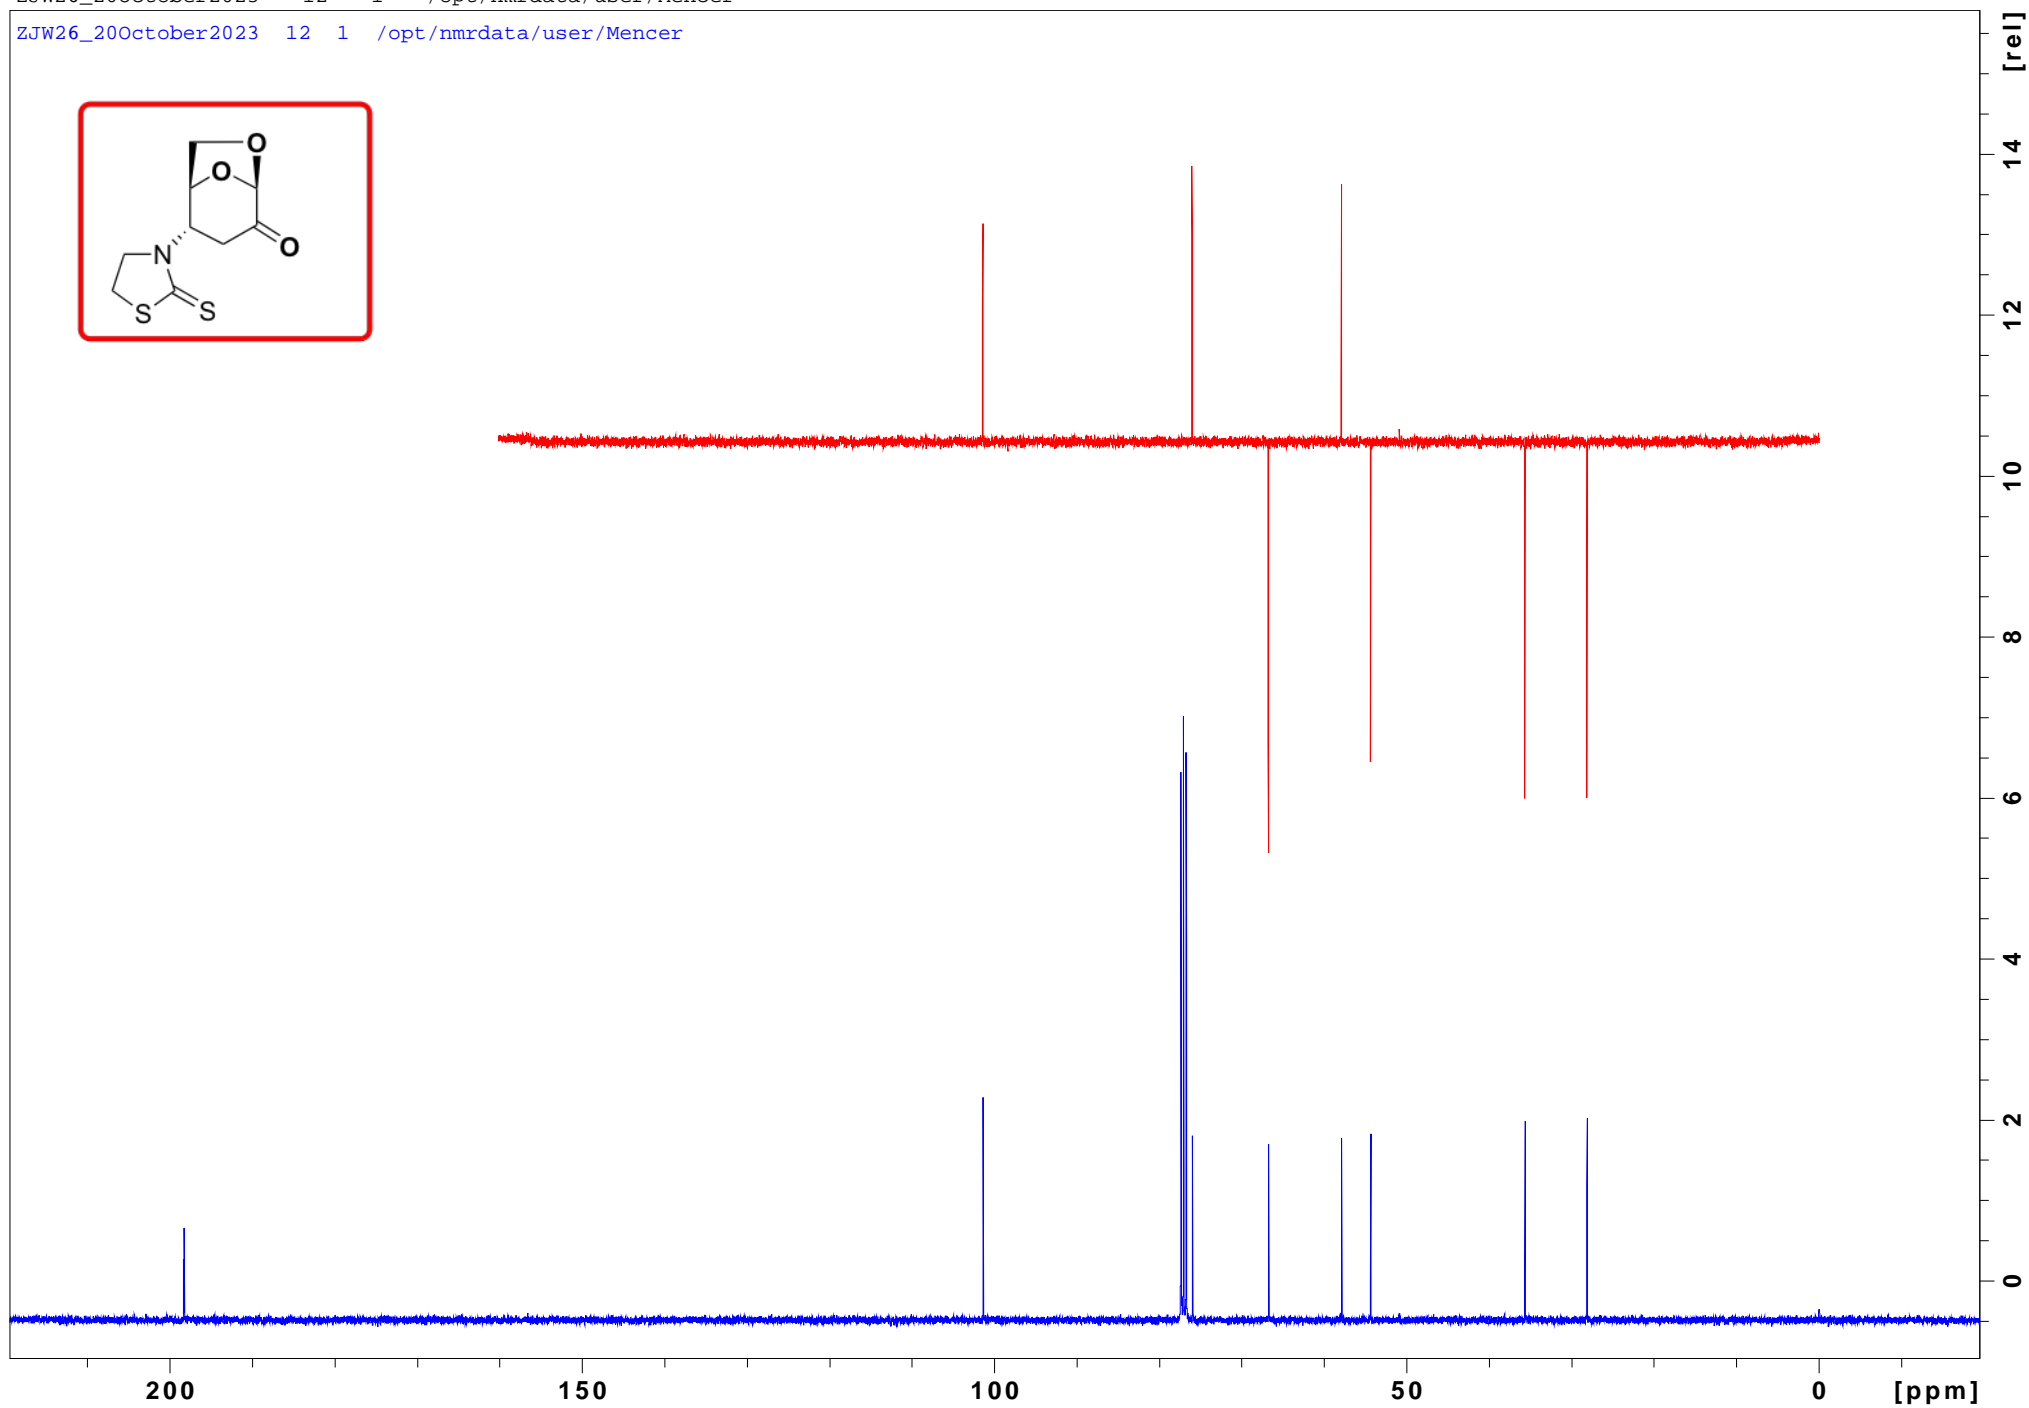

TIC  
2023\_11\_22\_ZJW23\_Scan1\_is1.datx 2023.11.22 02:45:16 Any B research samples Nov 2023;  
APCI + Settings for tune mix using source type APCI Positive.

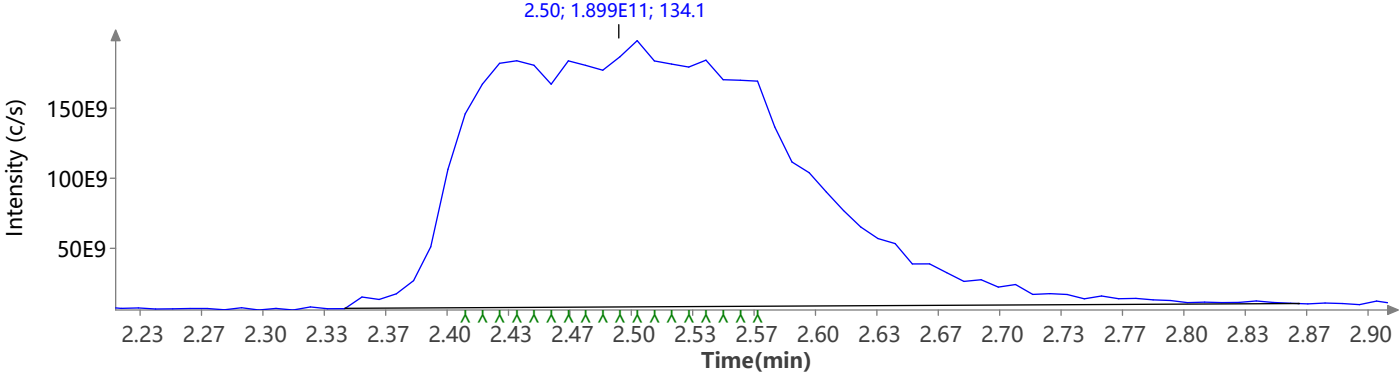

| Time (Peak Maximum M:S/Minutes) | Maximum Intensity (c/s) | Time (Peak Centroid M:S/Minutes) | Peak Area | % Peak Area | Peak Resolution | Base Peak Mass (m/z) | Label |
|---------------------------------|-------------------------|----------------------------------|-----------|-------------|-----------------|----------------------|-------|
| 2.50                            | 1.899E11                | 2.49                             | 2.27E12   | 43.6        | 11.8            | 134.1                |       |

Background RT 4.76 - 5.83 {115 scans}  
2023\_11\_22\_ZJW23\_Scan1\_is1.datx;  
APCI + Settings for tune mix using source type APCI Positive.

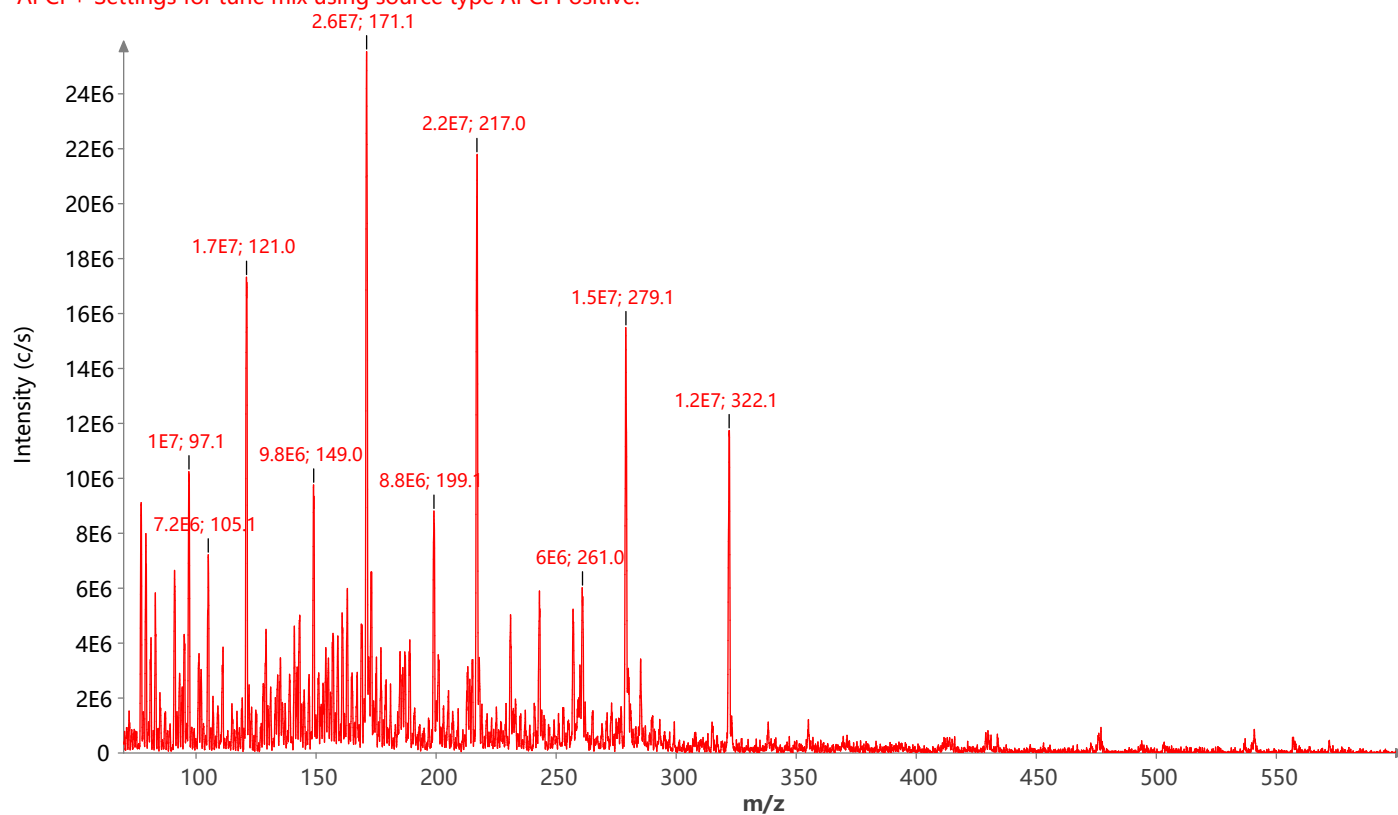

Spectrum RT 2.41 - 2.57 {18 scans} - Background Subtracted 4.76 - 5.83  
2023\_11\_22\_ZJW23\_Scan1\_is1.datx;  
APCI + Settings for tune mix using source type APCI Positive.

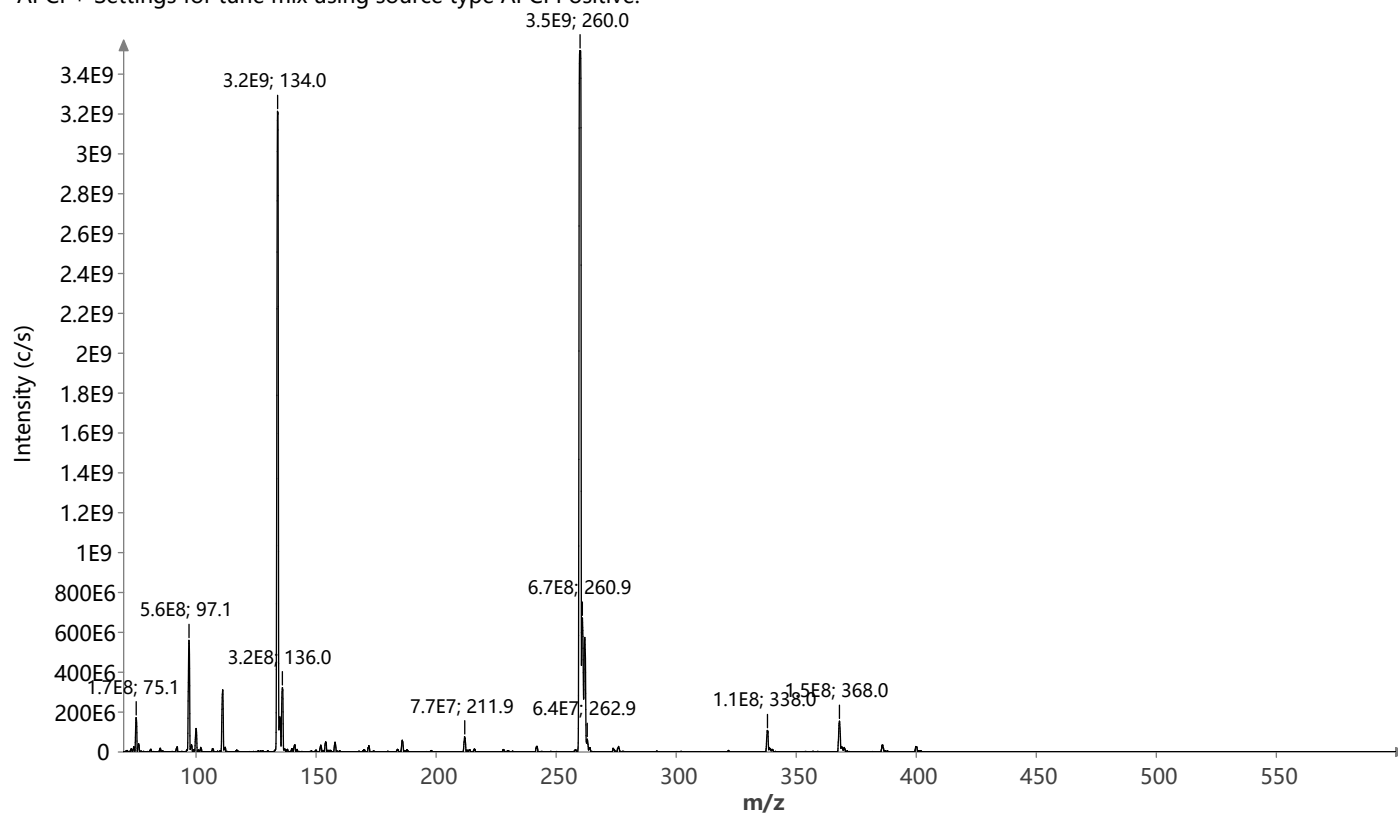

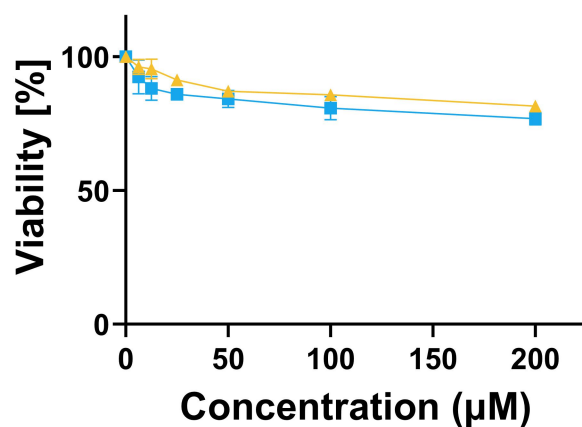

## Cytotoxicity

Figure S1. The cytotoxicity of FCP23 (blue) and FCP 26 (yellow) on PTEN2 normal cells. The cytotoxicity was analyzed after 72 h incubation with FCPs in 37 °C. WST-8 is reduced by dehydrogenases in viable cells and gives a yellow colored product—formazan, which was measured with microplate reader at 450 nM. Data represent the mean  $\pm$  SD.

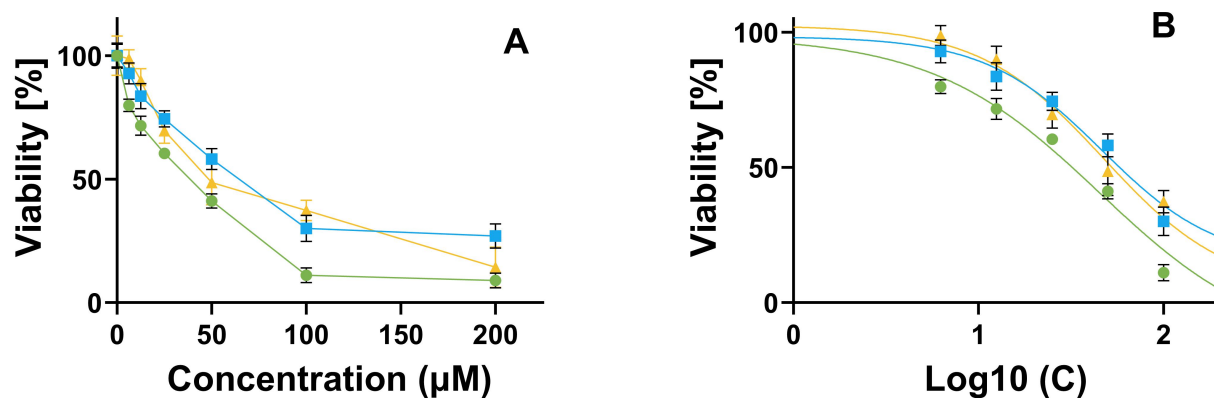

Figure S2. Representative figures demonstrating (A) the activity dependence of the varied concentrations of the etoposide (green), FCP23 (blue) and FCP 26 (yellow) along with (B) the approximation curves
